# Supplementary material for: The infection staging and profile of genotypic distribution and drug resistance mutation among the human immunodeficiency virus-1 infected blood donors from five Chinese blood centers, 2012–2014
Source: PubMed Central journal article supplement (PMC5473534; doi:10.1371/journal.pone.0179328), 2017-06-16
Supplement: pone.0179328.s004.pdf [file pone.0179328.s004.pdf]

Stanford University  
**HIV DRUG RESISTANCE DATABASE**

## HIVdb Program Report

Genotypic Resistance Interpretation Algorithm

HIVdb version 8.3 (last updated 2017-03-02)

### Sequence CQ12000196

#### Sequence Summary

|                       |                  |
|-----------------------|------------------|
| Sequence includes PR: | codons 1 - 99    |
| Sequence includes RT: | codons 1 - 241   |
| Subtype:              | CRF07_BC (2.65%) |
| PR SDRMs:             | L23I             |
| RT SDRMs:             | None             |

#### Sequence Quality Assessment

##### PR

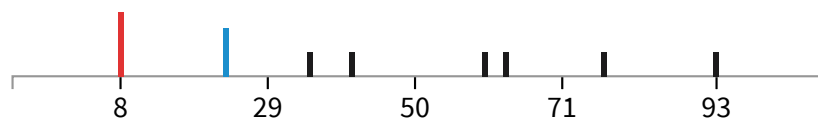

##### RT

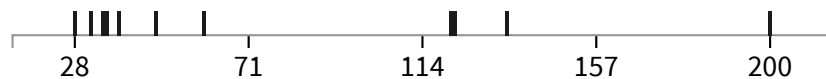

#### Drug Resistance Interpretation: PR

|                                    |                                         |
|------------------------------------|-----------------------------------------|
| PI Major Resistance Mutations:     | None                                    |
| PI Accessory Resistance Mutations: | <b>L23I</b>                             |
| Other Mutations:                   | R8L, E35D, R41K, D60E, L63P, V77I, I93L |

### Protease Inhibitors

|                                |                      |
|--------------------------------|----------------------|
| <b>atazanavir/r (ATV/r)</b>    | Susceptible          |
| <b>darunavir/r (DRV/r)</b>     | Susceptible          |
| <b>fosamprenavir/r (FPV/r)</b> | Susceptible          |
| <b>indinavir/r (IDV/r)</b>     | Susceptible          |
| <b>lopinavir/r (LPV/r)</b>     | Susceptible          |
| <b>nelfinavir (NFV)</b>        | Low-Level Resistance |
| <b>saquinavir/r (SQV/r)</b>    | Susceptible          |
| <b>tipranavir/r (TPV/r)</b>    | Susceptible          |

#### PR Comments

#### PI Accessory

- **L23I** is an uncommon non-polymorphic mutation selected primarily by NFV. It causes low-level NFV resistance.

#### Mutation Scoring: PR

| PI    | ATV/r | DRV/r | FPV/r | IDV/r | LPV/r | NFV | SQV/r | TPV/r |
|-------|-------|-------|-------|-------|-------|-----|-------|-------|
| L23I  | 0     | 0     | 0     | 0     | 0     | 15  | 0     | 0     |
| Total | 0     | 0     | 0     | 0     | 0     | 15  | 0     | 0     |

#### Drug Resistance Interpretation: RT

|                             |                                                                      |
|-----------------------------|----------------------------------------------------------------------|
| NRTI Resistance Mutations:  | None                                                                 |
| NNRTI Resistance Mutations: | None                                                                 |
| Other Mutations:            | E28K, K32E, V35T, E36A, T39D, S48T, V60I, D121H, K122E, I135T, T200I |

### Nucleoside Reverse Transcriptase Inhibitors

|                            |             |
|----------------------------|-------------|
| <b>abacavir (ABC)</b>      | Susceptible |
| <b>zidovudine (AZT)</b>    | Susceptible |
| <b>stavudine (D4T)</b>     | Susceptible |
| <b>didanosine (DDI)</b>    | Susceptible |
| <b>emtricitabine (FTC)</b> | Susceptible |

**lamivudine (3TC)**                      Susceptible  
**tenofovir (TDF)**                      Susceptible

#### **Non-nucleoside Reverse Transcriptase Inhibitors**

**efavirenz (EFV)**                      Susceptible  
**etravirine (ETR)**                      Susceptible  
**nevirapine (NVP)**                      Susceptible  
**rilpivirine (RPV)**                      Susceptible

#### Mutation Scoring: RT

| <b>NRTI</b> | <b>ABC</b> | <b>AZT</b> | <b>D4T</b> | <b>DDI</b> | <b>FTC</b> | <b>3TC</b> | <b>TDF</b> |
|-------------|------------|------------|------------|------------|------------|------------|------------|
| Total       | 0          | 0          | 0          | 0          | 0          | 0          | 0          |

| <b>NNRTI</b> | <b>EFV</b> | <b>ETR</b> | <b>NVP</b> | <b>RPV</b> |
|--------------|------------|------------|------------|------------|
| Total        | 0          | 0          | 0          | 0          |

## Sequence CQ12002493

### Sequence Summary

|                       |                |
|-----------------------|----------------|
| Sequence includes PR: | codons 1 - 99  |
| Sequence includes RT: | codons 1 - 241 |
| Subtype:              | B + C (3.53%)  |
| PR SDRMs:             | None           |
| RT SDRMs:             | None           |

### Sequence Quality Assessment

#### PR

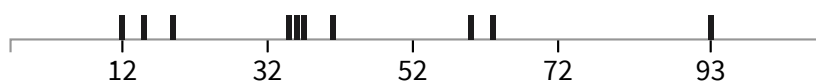

#### RT

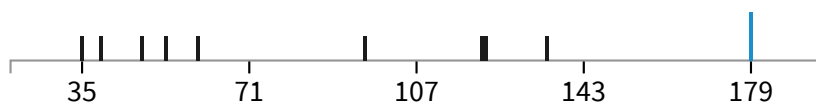

### Drug Resistance Interpretation: PR

|                                    |                                                            |
|------------------------------------|------------------------------------------------------------|
| PI Major Resistance Mutations:     | None                                                       |
| PI Accessory Resistance Mutations: | None                                                       |
| Other Mutations:                   | T12P, I15V, L19I, E35D, M36I, N37H, R41K, D60E, L63P, I93L |

#### Protease Inhibitors

|                                |             |
|--------------------------------|-------------|
| <b>atazanavir/r (ATV/r)</b>    | Susceptible |
| <b>darunavir/r (DRV/r)</b>     | Susceptible |
| <b>fosamprenavir/r (FPV/r)</b> | Susceptible |
| <b>indinavir/r (IDV/r)</b>     | Susceptible |
| <b>lopinavir/r (LPV/r)</b>     | Susceptible |
| <b>nelfinavir (NFV)</b>        | Susceptible |
| <b>saquinavir/r (SQV/r)</b>    | Susceptible |

**tipranavir/r (TPV/r)**

Susceptible

Mutation Scoring: PR

| PI    | ATV/r | DRV/r | FPV/r | IDV/r | LPV/r | NFV | SQV/r | TPV/r |
|-------|-------|-------|-------|-------|-------|-----|-------|-------|
| Total | 0     | 0     | 0     | 0     | 0     | 0   | 0     | 0     |

Drug Resistance Interpretation: RT

NRTI Resistance Mutations: None  
 NNRTI Resistance Mutations: **V179E**  
 Other Mutations: V35T, T39D, S48T, E53D, V60I, H96P, D121Y, K122E, I135R

**Nucleoside Reverse Transcriptase Inhibitors**

|                            |             |
|----------------------------|-------------|
| <b>abacavir (ABC)</b>      | Susceptible |
| <b>zidovudine (AZT)</b>    | Susceptible |
| <b>stavudine (D4T)</b>     | Susceptible |
| <b>didanosine (DDI)</b>    | Susceptible |
| <b>emtricitabine (FTC)</b> | Susceptible |
| <b>lamivudine (3TC)</b>    | Susceptible |
| <b>tenofovir (TDF)</b>     | Susceptible |

**Non-nucleoside Reverse Transcriptase Inhibitors**

|                          |                                |
|--------------------------|--------------------------------|
| <b>efavirenz (EFV)</b>   | Potential Low-Level Resistance |
| <b>etravirine (ETR)</b>  | Potential Low-Level Resistance |
| <b>nevirapine (NVP)</b>  | Potential Low-Level Resistance |
| <b>rilpivirine (RPV)</b> | Potential Low-Level Resistance |

**RT Comments****NNRTI**

- V179D is a polymorphic accessory NNRTI-selected mutation. It contributes low-levels reductions in susceptibility to each of the NNRTIs. The combination of V179D and K103R act synergistically to reduce NVP and EFV susceptibility. V179D has a low weight in the Tibotec ETR genotypic susceptibility score. **V179E** is a non-polymorphic mutation occasionally selected by NVP and EFV. **V179E** appears similar to V179D in its

effects on NNRTIs. **V179D/E** do not appear to reduce the virological response to a first-line EFV-containing regimen.

#### Mutation Scoring: RT

| <b>NRTI</b> | <b>ABC</b> | <b>AZT</b> | <b>D4T</b> | <b>DDI</b> | <b>FTC</b> | <b>3TC</b> | <b>TDF</b> |
|-------------|------------|------------|------------|------------|------------|------------|------------|
| Total       | 0          | 0          | 0          | 0          | 0          | 0          | 0          |

| <b>NNRTI</b> | <b>EFV</b> | <b>ETR</b> | <b>NVP</b> | <b>RPV</b> |
|--------------|------------|------------|------------|------------|
| V179E        | 10         | 10         | 10         | 10         |
| Total        | 10         | 10         | 10         | 10         |

## Sequence CQ12003214

### Sequence Summary

Sequence includes PR: codons 1 - 99  
 Sequence includes RT: codons 1 - 241  
 Subtype: B + C (3.04%)  
 PR SDRMs: M46I  
 RT SDRMs: None

### Sequence Quality Assessment

#### PR

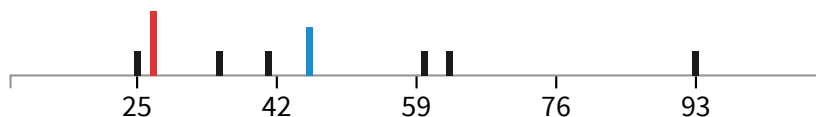

#### RT

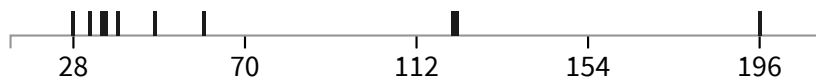

### Drug Resistance Interpretation: PR

PI Major Resistance Mutations: **M46I**  
 PI Accessory Resistance Mutations: None  
 Other Mutations: D25Y, G27R, E35D, R41K, D60E, L63P, I93L

#### Protease Inhibitors

|                                |                                |
|--------------------------------|--------------------------------|
| <b>atazanavir/r (ATV/r)</b>    | Potential Low-Level Resistance |
| <b>darunavir/r (DRV/r)</b>     | Susceptible                    |
| <b>fosamprenavir/r (FPV/r)</b> | Potential Low-Level Resistance |
| <b>indinavir/r (IDV/r)</b>     | Potential Low-Level Resistance |
| <b>lopinavir/r (LPV/r)</b>     | Potential Low-Level Resistance |
| <b>nelfinavir (NFV)</b>        | Intermediate Resistance        |
| <b>saquinavir/r (SQV/r)</b>    | Potential Low-Level Resistance |

**tipranavir/r (TPV/r)**

Susceptible

**PR Comments****PI Major**

- **M46I/L** are relatively non-polymorphic PI-selected mutations. In combination with other PI-resistance mutations, they are associated with reduced susceptibility to each of the PIs except DRV.

## Mutation Scoring: PR

| PI    | ATV/r | DRV/r | FPV/r | IDV/r | LPV/r | NFV | SQV/r | TPV/r |
|-------|-------|-------|-------|-------|-------|-----|-------|-------|
| M46I  | 10    | 0     | 10    | 10    | 10    | 30  | 10    | 5     |
| Total | 10    | 0     | 10    | 10    | 10    | 30  | 10    | 5     |

## Drug Resistance Interpretation: RT

NRTI Resistance Mutations: None  
 NNRTI Resistance Mutations: None  
 Other Mutations: E28K, K32E, V35T, E36A, T39D, S48T, V60I, D121H, K122E, G196R

**Nucleoside Reverse Transcriptase Inhibitors**

**abacavir (ABC)** Susceptible  
**zidovudine (AZT)** Susceptible  
**stavudine (D4T)** Susceptible  
**didanosine (DDI)** Susceptible  
**emtricitabine (FTC)** Susceptible  
**lamivudine (3TC)** Susceptible  
**tenofovir (TDF)** Susceptible

**Non-nucleoside Reverse Transcriptase Inhibitors**

**efavirenz (EFV)** Susceptible  
**etravirine (ETR)** Susceptible  
**nevirapine (NVP)** Susceptible  
**rilpivirine (RPV)** Susceptible



## Mutation Scoring: RT

| <b>NRTI</b> | <b>ABC</b> | <b>AZT</b> | <b>D4T</b> | <b>DDI</b> | <b>FTC</b> | <b>3TC</b> | <b>TDF</b> |
|-------------|------------|------------|------------|------------|------------|------------|------------|
| Total       | 0          | 0          | 0          | 0          | 0          | 0          | 0          |

| <b>NNRTI</b> | <b>EFV</b> | <b>ETR</b> | <b>NVP</b> | <b>RPV</b> |
|--------------|------------|------------|------------|------------|
| Total        | 0          | 0          | 0          | 0          |

## Sequence CQ12003677

### Sequence Summary

Sequence includes PR: codons 1 - 99  
 Sequence includes RT: codons 1 - 241  
 Subtype: CRF07\_BC (2.45%)  
 PR SDRMs: None  
 RT SDRMs: K219R

### Sequence Quality Assessment

#### PR

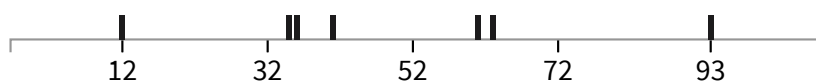

#### RT

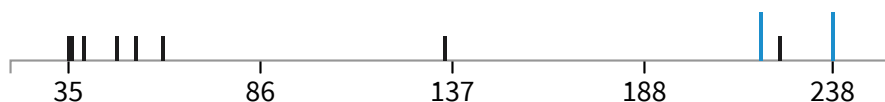

### Drug Resistance Interpretation: PR

PI Major Resistance Mutations: None  
 PI Accessory Resistance Mutations: None  
 Other Mutations: T12A, E35D, M36I, R41K, Q61H, L63P, I93L

#### Protease Inhibitors

|                                |             |
|--------------------------------|-------------|
| <b>atazanavir/r (ATV/r)</b>    | Susceptible |
| <b>darunavir/r (DRV/r)</b>     | Susceptible |
| <b>fosamprenavir/r (FPV/r)</b> | Susceptible |
| <b>indinavir/r (IDV/r)</b>     | Susceptible |
| <b>lopinavir/r (LPV/r)</b>     | Susceptible |
| <b>nelfinavir (NFV)</b>        | Susceptible |
| <b>saquinavir/r (SQV/r)</b>    | Susceptible |
| <b>tipranavir/r (TPV/r)</b>    | Susceptible |

## Mutation Scoring: PR

| PI    | ATV/r | DRV/r | FPV/r | IDV/r | LPV/r | NFV | SQV/r | TPV/r |
|-------|-------|-------|-------|-------|-------|-----|-------|-------|
| Total | 0     | 0     | 0     | 0     | 0     | 0   | 0     | 0     |

## Drug Resistance Interpretation: RT

NRTI Resistance Mutations: **K219R**  
 NNRTI Resistance Mutations: **K238N**  
 Other Mutations: V35T, E36A, T39D, S48T, E53D, V60I, I135V, E224D

### Nucleoside Reverse Transcriptase Inhibitors

|                            |                                |
|----------------------------|--------------------------------|
| <b>abacavir (ABC)</b>      | Susceptible                    |
| <b>zidovudine (AZT)</b>    | Potential Low-Level Resistance |
| <b>stavudine (D4T)</b>     | Potential Low-Level Resistance |
| <b>didanosine (DDI)</b>    | Susceptible                    |
| <b>emtricitabine (FTC)</b> | Susceptible                    |
| <b>lamivudine (3TC)</b>    | Susceptible                    |
| <b>tenofovir (TDF)</b>     | Susceptible                    |

### Non-nucleoside Reverse Transcriptase Inhibitors

|                          |                                |
|--------------------------|--------------------------------|
| <b>efavirenz (EFV)</b>   | Potential Low-Level Resistance |
| <b>etravirine (ETR)</b>  | Susceptible                    |
| <b>nevirapine (NVP)</b>  | Potential Low-Level Resistance |
| <b>rilpivirine (RPV)</b> | Susceptible                    |

### RT Comments

#### NRTI

- **K219N/R** are accessory TAMS that usually occur in combination with multiple other TAMS.

#### NNRTI

- K238T is a non-polymorphic mutation selected in patients receiving NVP and EFV. It usually occurs in combination with K103N. Alone it confers low/intermediate reductions in NVP and EFV susceptibility. **K238N** is a non-polymorphic accessory mutation that is also selected by NVP and EFV. It appears to have minimal, if any, effect on NNRTI susceptibility.

## Mutation Scoring: RT

| <b>NRTI</b> | <b>ABC</b> | <b>AZT</b> | <b>D4T</b> | <b>DDI</b> | <b>FTC</b> | <b>3TC</b> | <b>TDF</b> |
|-------------|------------|------------|------------|------------|------------|------------|------------|
| K219R       | 5          | 10         | 10         | 5          | 0          | 0          | 5          |
| Total       | 5          | 10         | 10         | 5          | 0          | 0          | 5          |

| <b>NNRTI</b> | <b>EFV</b> | <b>ETR</b> | <b>NVP</b> | <b>RPV</b> |
|--------------|------------|------------|------------|------------|
| K238N        | 10         | 0          | 10         | 0          |
| Total        | 10         | 0          | 10         | 0          |

## Sequence CQ12003834

### Sequence Summary

|                       |                  |
|-----------------------|------------------|
| Sequence includes PR: | codons 1 - 99    |
| Sequence includes RT: | codons 1 - 241   |
| Subtype:              | CRF07_BC (2.75%) |
| PR SDRMs:             | None             |
| RT SDRMs:             | None             |

### Sequence Quality Assessment

#### PR

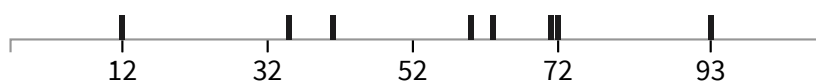

#### RT

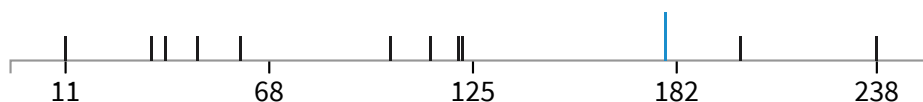

### Drug Resistance Interpretation: PR

|                                    |                                                |
|------------------------------------|------------------------------------------------|
| PI Major Resistance Mutations:     | None                                           |
| PI Accessory Resistance Mutations: | None                                           |
| Other Mutations:                   | T12A, E35D, R41K, D60E, L63P, A71V, I72T, I93L |

#### Protease Inhibitors

|                                |             |
|--------------------------------|-------------|
| <b>atazanavir/r (ATV/r)</b>    | Susceptible |
| <b>darunavir/r (DRV/r)</b>     | Susceptible |
| <b>fosamprenavir/r (FPV/r)</b> | Susceptible |
| <b>indinavir/r (IDV/r)</b>     | Susceptible |
| <b>lopinavir/r (LPV/r)</b>     | Susceptible |
| <b>nelfinavir (NFV)</b>        | Susceptible |
| <b>saquinavir/r (SQV/r)</b>    | Susceptible |
| <b>tipranavir/r (TPV/r)</b>    | Susceptible |

**PR Comments****Other**

- **A71V/T** are polymorphic, PI-selected accessory mutations that increase the replication of viruses with other PI-resistance mutations.

## Mutation Scoring: PR

| PI    | ATV/r | DRV/r | FPV/r | IDV/r | LPV/r | NFV | SQV/r | TPV/r |
|-------|-------|-------|-------|-------|-------|-----|-------|-------|
| Total | 0     | 0     | 0     | 0     | 0     | 0   | 0     | 0     |

## Drug Resistance Interpretation: RT

NRTI Resistance Mutations: None  
 NNRTI Resistance Mutations: **V179D**  
 Other Mutations: K11N, V35T, T39N, S48T, V60I, K102R, D113N, D121H, K122E, T200I, K238R

**Nucleoside Reverse Transcriptase Inhibitors**

|                            |             |
|----------------------------|-------------|
| <b>abacavir (ABC)</b>      | Susceptible |
| <b>zidovudine (AZT)</b>    | Susceptible |
| <b>stavudine (D4T)</b>     | Susceptible |
| <b>didanosine (DDI)</b>    | Susceptible |
| <b>emtricitabine (FTC)</b> | Susceptible |
| <b>lamivudine (3TC)</b>    | Susceptible |
| <b>tenofovir (TDF)</b>     | Susceptible |

**Non-nucleoside Reverse Transcriptase Inhibitors**

|                          |                                |
|--------------------------|--------------------------------|
| <b>efavirenz (EFV)</b>   | Potential Low-Level Resistance |
| <b>etravirine (ETR)</b>  | Potential Low-Level Resistance |
| <b>nevirapine (NVP)</b>  | Potential Low-Level Resistance |
| <b>rilpivirine (RPV)</b> | Potential Low-Level Resistance |

**RT Comments****NNRTI**

- **V179D** is a polymorphic accessory NNRTI-selected mutation. It contributes low-levels reductions in susceptibility to each of the NNRTIs. The combination of **V179D** and K103R act synergistically to reduce NVP and EFV susceptibility. **V179D** has a low weight in the Tibotec ETR genotypic susceptibility score. V179E is a non-polymorphic mutation occasionally selected by NVP and EFV. V179E appears similar to **V179D** in its effects on NNRTIs. **V179D/E** do not appear to reduce the virological response to a first-line EFV-containing regimen.

#### Other

- **K238R** is a common polymorphism that does not reduce NNRTI susceptibility.

#### Mutation Scoring: RT

| NRTI  | ABC | AZT | D4T | DDI | FTC | 3TC | TDF |
|-------|-----|-----|-----|-----|-----|-----|-----|
| Total | 0   | 0   | 0   | 0   | 0   | 0   | 0   |

| NNRTI | EFV | ETR | NVP | RPV |
|-------|-----|-----|-----|-----|
| V179D | 10  | 10  | 10  | 10  |
| Total | 10  | 10  | 10  | 10  |

## Sequence cq12004073

### Sequence Summary

|                       |                   |
|-----------------------|-------------------|
| Sequence includes PR: | codons 1 - 99     |
| Sequence includes RT: | codons 1 - 241    |
| Subtype:              | CRF55_01B (2.94%) |
| PR SDRMs:             | None              |
| RT SDRMs:             | None              |

### Sequence Quality Assessment

#### PR

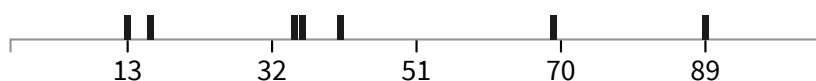

#### RT

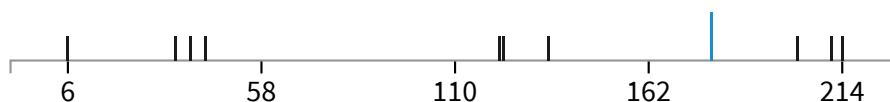

### Drug Resistance Interpretation: PR

|                                    |                                          |
|------------------------------------|------------------------------------------|
| PI Major Resistance Mutations:     | None                                     |
| PI Accessory Resistance Mutations: | None                                     |
| Other Mutations:                   | I13V, G16E, E35D, M36I, R41K, H69K, L89M |

#### Protease Inhibitors

|                                |             |
|--------------------------------|-------------|
| <b>atazanavir/r (ATV/r)</b>    | Susceptible |
| <b>darunavir/r (DRV/r)</b>     | Susceptible |
| <b>fosamprenavir/r (FPV/r)</b> | Susceptible |
| <b>indinavir/r (IDV/r)</b>     | Susceptible |
| <b>lopinavir/r (LPV/r)</b>     | Susceptible |
| <b>nelfinavir (NFV)</b>        | Susceptible |
| <b>saquinavir/r (SQV/r)</b>    | Susceptible |
| <b>tipranavir/r (TPV/r)</b>    | Susceptible |



## Mutation Scoring: PR

| PI    | ATV/r | DRV/r | FPV/r | IDV/r | LPV/r | NFV | SQV/r | TPV/r |
|-------|-------|-------|-------|-------|-------|-----|-------|-------|
| Total | 0     | 0     | 0     | 0     | 0     | 0   | 0     | 0     |

## Drug Resistance Interpretation: RT

NRTI Resistance Mutations: None  
 NNRTI Resistance Mutations: **V179E**  
 Other Mutations: E6D, V35T, T39K, K43E, K122E, D123S, I135R, I202V, R211K, F214L

### Nucleoside Reverse Transcriptase Inhibitors

|                            |             |
|----------------------------|-------------|
| <b>abacavir (ABC)</b>      | Susceptible |
| <b>zidovudine (AZT)</b>    | Susceptible |
| <b>stavudine (D4T)</b>     | Susceptible |
| <b>didanosine (DDI)</b>    | Susceptible |
| <b>emtricitabine (FTC)</b> | Susceptible |
| <b>lamivudine (3TC)</b>    | Susceptible |
| <b>tenofovir (TDF)</b>     | Susceptible |

### Non-nucleoside Reverse Transcriptase Inhibitors

|                          |                                |
|--------------------------|--------------------------------|
| <b>efavirenz (EFV)</b>   | Potential Low-Level Resistance |
| <b>etravirine (ETR)</b>  | Potential Low-Level Resistance |
| <b>nevirapine (NVP)</b>  | Potential Low-Level Resistance |
| <b>rilpivirine (RPV)</b> | Potential Low-Level Resistance |

### RT Comments

#### NNRTI

- V179D is a polymorphic accessory NNRTI-selected mutation. It contributes low-levels reductions in susceptibility to each of the NNRTIs. The combination of V179D and K103R act synergistically to reduce NVP and EFV susceptibility. V179D has a low weight in the Tibotec ETR genotypic susceptibility score. **V179E** is a non-polymorphic mutation occasionally selected by NVP and EFV. **V179E** appears similar to V179D in its effects on NNRTIs. **V179D/E** do not appear to reduce the virological response to a first-line EFV-containing regimen.

## Mutation Scoring: RT

| <b>NRTI</b> | <b>ABC</b> | <b>AZT</b> | <b>D4T</b> | <b>DDI</b> | <b>FTC</b> | <b>3TC</b> | <b>TDF</b> |
|-------------|------------|------------|------------|------------|------------|------------|------------|
| Total       | 0          | 0          | 0          | 0          | 0          | 0          | 0          |

| <b>NNRTI</b> | <b>EFV</b> | <b>ETR</b> | <b>NVP</b> | <b>RPV</b> |
|--------------|------------|------------|------------|------------|
| V179E        | 10         | 10         | 10         | 10         |
| Total        | 10         | 10         | 10         | 10         |

## Sequence cq12004297

### Sequence Summary

|                       |                  |
|-----------------------|------------------|
| Sequence includes PR: | codons 1 - 99    |
| Sequence includes RT: | codons 1 - 241   |
| Subtype:              | CRF08_BC (2.55%) |
| PR SDRMs:             | None             |
| RT SDRMs:             | None             |

### Sequence Quality Assessment

#### PR

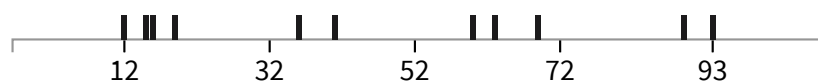

#### RT

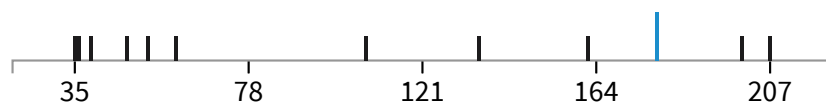

### Drug Resistance Interpretation: PR

|                                    |                                                                  |
|------------------------------------|------------------------------------------------------------------|
| PI Major Resistance Mutations:     | None                                                             |
| PI Accessory Resistance Mutations: | None                                                             |
| Other Mutations:                   | T12S, I15V, G16E, L19I, M36V, R41K, D60E, L63T, H69K, L89M, I93L |

#### Protease Inhibitors

|                                |             |
|--------------------------------|-------------|
| <b>atazanavir/r (ATV/r)</b>    | Susceptible |
| <b>darunavir/r (DRV/r)</b>     | Susceptible |
| <b>fosamprenavir/r (FPV/r)</b> | Susceptible |
| <b>indinavir/r (IDV/r)</b>     | Susceptible |
| <b>lopinavir/r (LPV/r)</b>     | Susceptible |
| <b>nelfinavir (NFV)</b>        | Susceptible |
| <b>saquinavir/r (SQV/r)</b>    | Susceptible |

**tipranavir/r (TPV/r)**

Susceptible

Mutation Scoring: PR

| PI    | ATV/r | DRV/r | FPV/r | IDV/r | LPV/r | NFV | SQV/r | TPV/r |
|-------|-------|-------|-------|-------|-------|-----|-------|-------|
| Total | 0     | 0     | 0     | 0     | 0     | 0   | 0     | 0     |

Drug Resistance Interpretation: RT

NRTI Resistance Mutations: None

NNRTI Resistance Mutations: **V179D**

Other Mutations: V35T, E36A, T39E, S48T, E53D, V60I, T107S, I135V, S162C, T200A, Q207E

**Nucleoside Reverse Transcriptase Inhibitors**

|                            |             |
|----------------------------|-------------|
| <b>abacavir (ABC)</b>      | Susceptible |
| <b>zidovudine (AZT)</b>    | Susceptible |
| <b>stavudine (D4T)</b>     | Susceptible |
| <b>didanosine (DDI)</b>    | Susceptible |
| <b>emtricitabine (FTC)</b> | Susceptible |
| <b>lamivudine (3TC)</b>    | Susceptible |
| <b>tenofovir (TDF)</b>     | Susceptible |

**Non-nucleoside Reverse Transcriptase Inhibitors**

|                          |                                |
|--------------------------|--------------------------------|
| <b>efavirenz (EFV)</b>   | Potential Low-Level Resistance |
| <b>etravirine (ETR)</b>  | Potential Low-Level Resistance |
| <b>nevirapine (NVP)</b>  | Potential Low-Level Resistance |
| <b>rilpivirine (RPV)</b> | Potential Low-Level Resistance |

**RT Comments****NNRTI**

- **V179D** is a polymorphic accessory NNRTI-selected mutation. It contributes low-levels reductions in susceptibility to each of the NNRTIs. The combination of **V179D** and K103R act synergistically to reduce NVP and EFV susceptibility. **V179D** has a low weight in the Tibotec ETR genotypic susceptibility score. V179E is a non-polymorphic mutation occasionally selected by NVP and EFV. V179E appears similar to **V179D** in its

effects on NNRTIs. **V179D/E** do not appear to reduce the virological response to a first-line EFV-containing regimen.

#### Mutation Scoring: RT

| <b>NRTI</b> | <b>ABC</b> | <b>AZT</b> | <b>D4T</b> | <b>DDI</b> | <b>FTC</b> | <b>3TC</b> | <b>TDF</b> |
|-------------|------------|------------|------------|------------|------------|------------|------------|
| Total       | 0          | 0          | 0          | 0          | 0          | 0          | 0          |

| <b>NNRTI</b> | <b>EFV</b> | <b>ETR</b> | <b>NVP</b> | <b>RPV</b> |
|--------------|------------|------------|------------|------------|
| V179D        | 10         | 10         | 10         | 10         |
| Total        | 10         | 10         | 10         | 10         |

## Sequence cq12004326

### Sequence Summary

|                       |                  |
|-----------------------|------------------|
| Sequence includes PR: | codons 1 - 99    |
| Sequence includes RT: | codons 1 - 241   |
| Subtype:              | CRF07_BC (2.65%) |
| PR SDRMs:             | None             |
| RT SDRMs:             | None             |

### Sequence Quality Assessment

#### PR

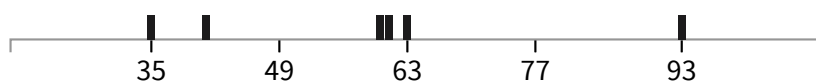

#### RT

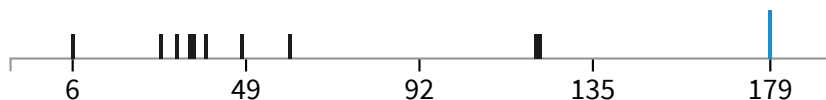

### Drug Resistance Interpretation: PR

|                                    |                                    |
|------------------------------------|------------------------------------|
| PI Major Resistance Mutations:     | None                               |
| PI Accessory Resistance Mutations: | None                               |
| Other Mutations:                   | E35D, R41K, D60E, Q61E, L63P, I93L |

#### Protease Inhibitors

|                                |             |
|--------------------------------|-------------|
| <b>atazanavir/r (ATV/r)</b>    | Susceptible |
| <b>darunavir/r (DRV/r)</b>     | Susceptible |
| <b>fosamprenavir/r (FPV/r)</b> | Susceptible |
| <b>indinavir/r (IDV/r)</b>     | Susceptible |
| <b>lopinavir/r (LPV/r)</b>     | Susceptible |
| <b>nelfinavir (NFV)</b>        | Susceptible |
| <b>saquinavir/r (SQV/r)</b>    | Susceptible |
| <b>tipranavir/r (TPV/r)</b>    | Susceptible |

## Mutation Scoring: PR

| PI    | ATV/r | DRV/r | FPV/r | IDV/r | LPV/r | NFV | SQV/r | TPV/r |
|-------|-------|-------|-------|-------|-------|-----|-------|-------|
| Total | 0     | 0     | 0     | 0     | 0     | 0   | 0     | 0     |

## Drug Resistance Interpretation: RT

NRTI Resistance Mutations: None  
 NNRTI Resistance Mutations: **V179D**  
 Other Mutations: E6K, E28K, K32E, V35T, E36A, T39N, S48T, V60I, D121Y, K122E

### Nucleoside Reverse Transcriptase Inhibitors

|                            |             |
|----------------------------|-------------|
| <b>abacavir (ABC)</b>      | Susceptible |
| <b>zidovudine (AZT)</b>    | Susceptible |
| <b>stavudine (D4T)</b>     | Susceptible |
| <b>didanosine (DDI)</b>    | Susceptible |
| <b>emtricitabine (FTC)</b> | Susceptible |
| <b>lamivudine (3TC)</b>    | Susceptible |
| <b>tenofovir (TDF)</b>     | Susceptible |

### Non-nucleoside Reverse Transcriptase Inhibitors

|                          |                                |
|--------------------------|--------------------------------|
| <b>efavirenz (EFV)</b>   | Potential Low-Level Resistance |
| <b>etravirine (ETR)</b>  | Potential Low-Level Resistance |
| <b>nevirapine (NVP)</b>  | Potential Low-Level Resistance |
| <b>rilpivirine (RPV)</b> | Potential Low-Level Resistance |

### RT Comments

#### NNRTI

- **V179D** is a polymorphic accessory NNRTI-selected mutation. It contributes low-levels reductions in susceptibility to each of the NNRTIs. The combination of **V179D** and K103R act synergistically to reduce NVP and EFV susceptibility. **V179D** has a low weight in the Tibotec ETR genotypic susceptibility score. V179E is a non-polymorphic mutation occasionally selected by NVP and EFV. V179E appears similar to **V179D** in its effects on NNRTIs. **V179D/E** do not appear to reduce the virological response to a first-line EFV-containing regimen.

## Mutation Scoring: RT

| <b>NRTI</b> | <b>ABC</b> | <b>AZT</b> | <b>D4T</b> | <b>DDI</b> | <b>FTC</b> | <b>3TC</b> | <b>TDF</b> |
|-------------|------------|------------|------------|------------|------------|------------|------------|
| Total       | 0          | 0          | 0          | 0          | 0          | 0          | 0          |

| <b>NNRTI</b> | <b>EFV</b> | <b>ETR</b> | <b>NVP</b> | <b>RPV</b> |
|--------------|------------|------------|------------|------------|
| V179D        | 10         | 10         | 10         | 10         |
| Total        | 10         | 10         | 10         | 10         |



## Sequence cq12004551

### Sequence Summary

Sequence includes PR: codons 1 - 99  
 Sequence includes RT: codons 1 - 241  
 Subtype: CRF08\_BC (2.94%)  
 PR SDRMs: None  
 RT SDRMs: None

### Sequence Quality Assessment

#### PR

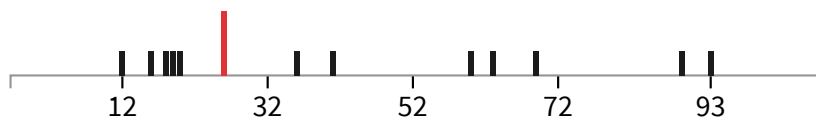

#### RT

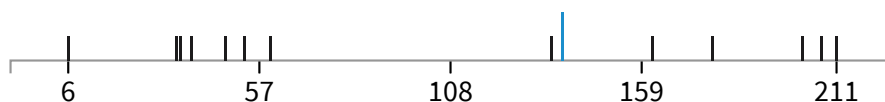

### Drug Resistance Interpretation: PR

PI Major Resistance Mutations: None  
 PI Accessory Resistance Mutations: None  
 Other Mutations: T12S, G16E, Q18P, L19I, K20R, T26R, M36I, R41K, D60E, L63V, H69K, L89M, I93L

#### Protease Inhibitors

|                                |             |
|--------------------------------|-------------|
| <b>atazanavir/r (ATV/r)</b>    | Susceptible |
| <b>darunavir/r (DRV/r)</b>     | Susceptible |
| <b>fosamprenavir/r (FPV/r)</b> | Susceptible |
| <b>indinavir/r (IDV/r)</b>     | Susceptible |
| <b>lopinavir/r (LPV/r)</b>     | Susceptible |
| <b>nelfinavir (NFV)</b>        | Susceptible |
| <b>saquinavir/r (SQV/r)</b>    | Susceptible |

**tipranavir/r (TPV/r)**

Susceptible

**PR Comments****Other**

- **K20R** is a highly polymorphic PI-selected accessory mutation.

## Mutation Scoring: PR

| PI    | ATV/r | DRV/r | FPV/r | IDV/r | LPV/r | NFV | SQV/r | TPV/r |
|-------|-------|-------|-------|-------|-------|-----|-------|-------|
| Total | 0     | 0     | 0     | 0     | 0     | 0   | 0     | 0     |

## Drug Resistance Interpretation: RT

NRTI Resistance Mutations: None  
 NNRTI Resistance Mutations: **E138A**  
 Other Mutations: E6D, V35T, E36A, T39D, S48T, E53D, V60I, I135V, S162C, I178L, I202V, Q207K, R211K

**Nucleoside Reverse Transcriptase Inhibitors**

|                            |             |
|----------------------------|-------------|
| <b>abacavir (ABC)</b>      | Susceptible |
| <b>zidovudine (AZT)</b>    | Susceptible |
| <b>stavudine (D4T)</b>     | Susceptible |
| <b>didanosine (DDI)</b>    | Susceptible |
| <b>emtricitabine (FTC)</b> | Susceptible |
| <b>lamivudine (3TC)</b>    | Susceptible |
| <b>tenofovir (TDF)</b>     | Susceptible |

**Non-nucleoside Reverse Transcriptase Inhibitors**

|                          |                                |
|--------------------------|--------------------------------|
| <b>efavirenz (EFV)</b>   | Susceptible                    |
| <b>etravirine (ETR)</b>  | Potential Low-Level Resistance |
| <b>nevirapine (NVP)</b>  | Susceptible                    |
| <b>rilpivirine (RPV)</b> | Low-Level Resistance           |

**RT Comments**

**NNRTI**

- **E138A** is a common polymorphic accessory mutation weakly selected in patients receiving ETR and RPV. It confers a borderline low-level reduction in RPV susceptibility. It has a low weight in the Tibotec ETR genotypic susceptibility score.

## Mutation Scoring: RT

| <b>NRTI</b> | <b>ABC</b> | <b>AZT</b> | <b>D4T</b> | <b>DDI</b> | <b>FTC</b> | <b>3TC</b> | <b>TDF</b> |
|-------------|------------|------------|------------|------------|------------|------------|------------|
| Total       | 0          | 0          | 0          | 0          | 0          | 0          | 0          |

| <b>NNRTI</b> | <b>EFV</b> | <b>ETR</b> | <b>NVP</b> | <b>RPV</b> |
|--------------|------------|------------|------------|------------|
| E138A        | 0          | 10         | 0          | 15         |
| Total        | 0          | 10         | 0          | 15         |

## Sequence CQ13000959

### Sequence Summary

|                       |                |
|-----------------------|----------------|
| Sequence includes PR: | codons 1 - 99  |
| Sequence includes RT: | codons 1 - 241 |
| Subtype:              | B + C (3.33%)  |
| PR SDRMs:             | None           |
| RT SDRMs:             | None           |

### Sequence Quality Assessment

#### PR

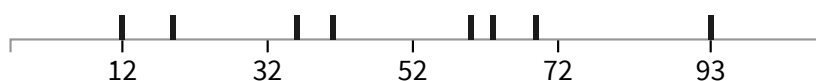

#### RT

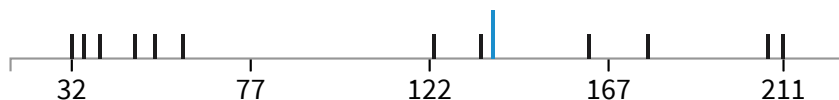

### Drug Resistance Interpretation: PR

|                                    |                                                |
|------------------------------------|------------------------------------------------|
| PI Major Resistance Mutations:     | None                                           |
| PI Accessory Resistance Mutations: | None                                           |
| Other Mutations:                   | T12S, L19I, M36I, R41K, D60E, L63P, H69K, I93L |

#### Protease Inhibitors

|                                |             |
|--------------------------------|-------------|
| <b>atazanavir/r (ATV/r)</b>    | Susceptible |
| <b>darunavir/r (DRV/r)</b>     | Susceptible |
| <b>fosamprenavir/r (FPV/r)</b> | Susceptible |
| <b>indinavir/r (IDV/r)</b>     | Susceptible |
| <b>lopinavir/r (LPV/r)</b>     | Susceptible |
| <b>nelfinavir (NFV)</b>        | Susceptible |
| <b>saquinavir/r (SQV/r)</b>    | Susceptible |
| <b>tipranavir/r (TPV/r)</b>    | Susceptible |

## Mutation Scoring: PR

| PI    | ATV/r | DRV/r | FPV/r | IDV/r | LPV/r | NFV | SQV/r | TPV/r |
|-------|-------|-------|-------|-------|-------|-----|-------|-------|
| Total | 0     | 0     | 0     | 0     | 0     | 0   | 0     | 0     |

## Drug Resistance Interpretation: RT

NRTI Resistance Mutations: None  
 NNRTI Resistance Mutations: **E138A**  
 Other Mutations: K32R, V35T, T39D, S48T, E53D, V60I, D123E, I135V, S162C, D177E, Q207E, R211K

### Nucleoside Reverse Transcriptase Inhibitors

|                            |             |
|----------------------------|-------------|
| <b>abacavir (ABC)</b>      | Susceptible |
| <b>zidovudine (AZT)</b>    | Susceptible |
| <b>stavudine (D4T)</b>     | Susceptible |
| <b>didanosine (DDI)</b>    | Susceptible |
| <b>emtricitabine (FTC)</b> | Susceptible |
| <b>lamivudine (3TC)</b>    | Susceptible |
| <b>tenofovir (TDF)</b>     | Susceptible |

### Non-nucleoside Reverse Transcriptase Inhibitors

|                          |                                |
|--------------------------|--------------------------------|
| <b>efavirenz (EFV)</b>   | Susceptible                    |
| <b>etravirine (ETR)</b>  | Potential Low-Level Resistance |
| <b>nevirapine (NVP)</b>  | Susceptible                    |
| <b>rilpivirine (RPV)</b> | Low-Level Resistance           |

### RT Comments

#### NNRTI

- **E138A** is a common polymorphic accessory mutation weakly selected in patients receiving ETR and RPV. It confers a borderline low-level reduction in RPV susceptibility. It has a low weight in the Tibotec ETR genotypic susceptibility score.

## Mutation Scoring: RT

| <b>NRTI</b> | <b>ABC</b> | <b>AZT</b> | <b>D4T</b> | <b>DDI</b> | <b>FTC</b> | <b>3TC</b> | <b>TDF</b> |
|-------------|------------|------------|------------|------------|------------|------------|------------|
| Total       | 0          | 0          | 0          | 0          | 0          | 0          | 0          |

| <b>NNRTI</b> | <b>EFV</b> | <b>ETR</b> | <b>NVP</b> | <b>RPV</b> |
|--------------|------------|------------|------------|------------|
| E138A        | 0          | 10         | 0          | 15         |
| Total        | 0          | 10         | 0          | 15         |

## Sequence CQ13001022

### Sequence Summary

Sequence includes PR: codons 1 - 99  
 Sequence includes RT: codons 1 - 241  
 Subtype: B + C (3.33%)  
 PR SDRMs: None  
 RT SDRMs: None

### Sequence Quality Assessment

#### PR



#### RT

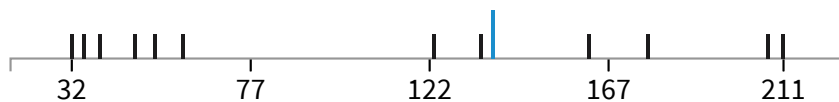

### Drug Resistance Interpretation: PR

PI Major Resistance Mutations: None  
 PI Accessory Resistance Mutations: None  
 Other Mutations: T12S, L19I, M36I, R41K, D60E, L63P, H69K, I93L

#### Protease Inhibitors

|                                |             |
|--------------------------------|-------------|
| <b>atazanavir/r (ATV/r)</b>    | Susceptible |
| <b>darunavir/r (DRV/r)</b>     | Susceptible |
| <b>fosamprenavir/r (FPV/r)</b> | Susceptible |
| <b>indinavir/r (IDV/r)</b>     | Susceptible |
| <b>lopinavir/r (LPV/r)</b>     | Susceptible |
| <b>nelfinavir (NFV)</b>        | Susceptible |
| <b>saquinavir/r (SQV/r)</b>    | Susceptible |
| <b>tipranavir/r (TPV/r)</b>    | Susceptible |

## Mutation Scoring: PR

| PI    | ATV/r | DRV/r | FPV/r | IDV/r | LPV/r | NFV | SQV/r | TPV/r |
|-------|-------|-------|-------|-------|-------|-----|-------|-------|
| Total | 0     | 0     | 0     | 0     | 0     | 0   | 0     | 0     |

## Drug Resistance Interpretation: RT

NRTI Resistance Mutations: None  
 NNRTI Resistance Mutations: **E138A**  
 Other Mutations: K32R, V35T, T39D, S48T, E53D, V60I, D123E, I135V, S162C, D177E, Q207E, R211K

### Nucleoside Reverse Transcriptase Inhibitors

|                            |             |
|----------------------------|-------------|
| <b>abacavir (ABC)</b>      | Susceptible |
| <b>zidovudine (AZT)</b>    | Susceptible |
| <b>stavudine (D4T)</b>     | Susceptible |
| <b>didanosine (DDI)</b>    | Susceptible |
| <b>emtricitabine (FTC)</b> | Susceptible |
| <b>lamivudine (3TC)</b>    | Susceptible |
| <b>tenofovir (TDF)</b>     | Susceptible |

### Non-nucleoside Reverse Transcriptase Inhibitors

|                          |                                |
|--------------------------|--------------------------------|
| <b>efavirenz (EFV)</b>   | Susceptible                    |
| <b>etravirine (ETR)</b>  | Potential Low-Level Resistance |
| <b>nevirapine (NVP)</b>  | Susceptible                    |
| <b>rilpivirine (RPV)</b> | Low-Level Resistance           |

### RT Comments

#### NNRTI

- **E138A** is a common polymorphic accessory mutation weakly selected in patients receiving ETR and RPV. It confers a borderline low-level reduction in RPV susceptibility. It has a low weight in the Tibotec ETR genotypic susceptibility score.

## Mutation Scoring: RT



| <b>NRTI</b> | <b>ABC</b> | <b>AZT</b> | <b>D4T</b> | <b>DDI</b> | <b>FTC</b> | <b>3TC</b> | <b>TDF</b> |
|-------------|------------|------------|------------|------------|------------|------------|------------|
| Total       | 0          | 0          | 0          | 0          | 0          | 0          | 0          |

| <b>NNRTI</b> | <b>EFV</b> | <b>ETR</b> | <b>NVP</b> | <b>RPV</b> |
|--------------|------------|------------|------------|------------|
| E138A        | 0          | 10         | 0          | 15         |
| Total        | 0          | 10         | 0          | 15         |

## Sequence CQ13001278

### Sequence Summary

|                       |                |
|-----------------------|----------------|
| Sequence includes PR: | codons 1 - 99  |
| Sequence includes RT: | codons 1 - 241 |
| Subtype:              | B + C (3.04%)  |
| PR SDRMs:             | None           |
| RT SDRMs:             | None           |

### Sequence Quality Assessment

#### PR

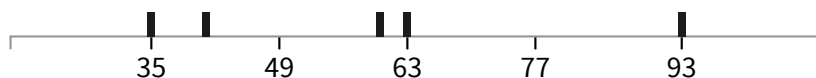

#### RT

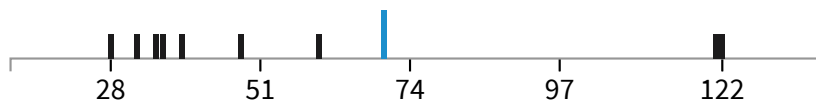

### Drug Resistance Interpretation: PR

|                                    |                              |
|------------------------------------|------------------------------|
| PI Major Resistance Mutations:     | None                         |
| PI Accessory Resistance Mutations: | None                         |
| Other Mutations:                   | E35D, R41K, D60E, L63P, I93L |

#### Protease Inhibitors

|                                |             |
|--------------------------------|-------------|
| <b>atazanavir/r (ATV/r)</b>    | Susceptible |
| <b>darunavir/r (DRV/r)</b>     | Susceptible |
| <b>fosamprenavir/r (FPV/r)</b> | Susceptible |
| <b>indinavir/r (IDV/r)</b>     | Susceptible |
| <b>lopinavir/r (LPV/r)</b>     | Susceptible |
| <b>nelfinavir (NFV)</b>        | Susceptible |
| <b>saquinavir/r (SQV/r)</b>    | Susceptible |
| <b>tipranavir/r (TPV/r)</b>    | Susceptible |

## Mutation Scoring: PR

| PI    | ATV/r | DRV/r | FPV/r | IDV/r | LPV/r | NFV | SQV/r | TPV/r |
|-------|-------|-------|-------|-------|-------|-----|-------|-------|
| Total | 0     | 0     | 0     | 0     | 0     | 0   | 0     | 0     |

## Drug Resistance Interpretation: RT

NRTI Resistance Mutations: **K70Q**  
 NNRTI Resistance Mutations: None  
 Other Mutations: E28K, K32E, V35T, E36A, T39N, S48T, V60L, D121Y, K122E

### Nucleoside Reverse Transcriptase Inhibitors

|                            |                                |
|----------------------------|--------------------------------|
| <b>abacavir (ABC)</b>      | Low-Level Resistance           |
| <b>zidovudine (AZT)</b>    | Susceptible                    |
| <b>stavudine (D4T)</b>     | Low-Level Resistance           |
| <b>didanosine (DDI)</b>    | Low-Level Resistance           |
| <b>emtricitabine (FTC)</b> | Potential Low-Level Resistance |
| <b>lamivudine (3TC)</b>    | Potential Low-Level Resistance |
| <b>tenofovir (TDF)</b>     | Low-Level Resistance           |

### Non-nucleoside Reverse Transcriptase Inhibitors

|                          |             |
|--------------------------|-------------|
| <b>efavirenz (EFV)</b>   | Susceptible |
| <b>etravirine (ETR)</b>  | Susceptible |
| <b>nevirapine (NVP)</b>  | Susceptible |
| <b>rilpivirine (RPV)</b> | Susceptible |

### RT Comments

#### NRTI

- K70E/G cause low-level resistance to TDF, ABC, DDI and possibly 3TC and FTC. K70E/G increase susceptibility to AZT. **K70Q/N/S/T** are rare non-polymorphic NRTI-selected mutations that appear to have resistance profiles similar to K70E/G.

## Mutation Scoring: RT

| <b>NRTI</b> | <b>ABC</b> | <b>AZT</b> | <b>D4T</b> | <b>DDI</b> | <b>FTC</b> | <b>3TC</b> | <b>TDF</b> |
|-------------|------------|------------|------------|------------|------------|------------|------------|
| K70Q        | 15         | 0          | 15         | 15         | 10         | 10         | 15         |
| Total       | 15         | 0          | 15         | 15         | 10         | 10         | 15         |

| <b>NNRTI</b> | <b>EFV</b> | <b>ETR</b> | <b>NVP</b> | <b>RPV</b> |
|--------------|------------|------------|------------|------------|
| Total        | 0          | 0          | 0          | 0          |

## Sequence CQ13001603

### Sequence Summary

Sequence includes PR: codons 1 - 99  
 Sequence includes RT: codons 1 - 241  
 Subtype: B + C (3.33%)  
 PR SDRMs: None  
 RT SDRMs: None

### Sequence Quality Assessment

#### PR

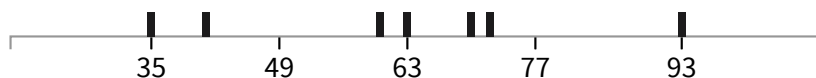

#### RT

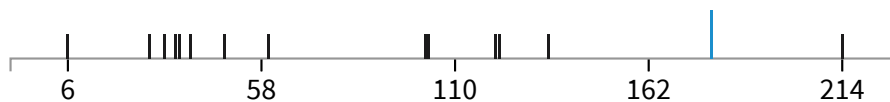

### Drug Resistance Interpretation: PR

PI Major Resistance Mutations: None  
 PI Accessory Resistance Mutations: None  
 Other Mutations: E35D, R41K, D60E, L63P, K70Q, I72V, I93L

#### Protease Inhibitors

|                                |             |
|--------------------------------|-------------|
| <b>atazanavir/r (ATV/r)</b>    | Susceptible |
| <b>darunavir/r (DRV/r)</b>     | Susceptible |
| <b>fosamprenavir/r (FPV/r)</b> | Susceptible |
| <b>indinavir/r (IDV/r)</b>     | Susceptible |
| <b>lopinavir/r (LPV/r)</b>     | Susceptible |
| <b>nelfinavir (NFV)</b>        | Susceptible |
| <b>saquinavir/r (SQV/r)</b>    | Susceptible |
| <b>tipranavir/r (TPV/r)</b>    | Susceptible |

## Mutation Scoring: PR

| PI    | ATV/r | DRV/r | FPV/r | IDV/r | LPV/r | NFV | SQV/r | TPV/r |
|-------|-------|-------|-------|-------|-------|-----|-------|-------|
| Total | 0     | 0     | 0     | 0     | 0     | 0   | 0     | 0     |

## Drug Resistance Interpretation: RT

|                             |                                                                                         |
|-----------------------------|-----------------------------------------------------------------------------------------|
| NRTI Resistance Mutations:  | None                                                                                    |
| NNRTI Resistance Mutations: | <b>V179D</b>                                                                            |
| Other Mutations:            | E6K, E28K, K32E, V35T, E36A, T39D, S48T, V60I, K102R, K103R, D121Y, K122E, I135K, F214L |

### Nucleoside Reverse Transcriptase Inhibitors

|                            |             |
|----------------------------|-------------|
| <b>abacavir (ABC)</b>      | Susceptible |
| <b>zidovudine (AZT)</b>    | Susceptible |
| <b>stavudine (D4T)</b>     | Susceptible |
| <b>didanosine (DDI)</b>    | Susceptible |
| <b>emtricitabine (FTC)</b> | Susceptible |
| <b>lamivudine (3TC)</b>    | Susceptible |
| <b>tenofovir (TDF)</b>     | Susceptible |

### Non-nucleoside Reverse Transcriptase Inhibitors

|                          |                                |
|--------------------------|--------------------------------|
| <b>efavirenz (EFV)</b>   | Intermediate Resistance        |
| <b>etravirine (ETR)</b>  | Potential Low-Level Resistance |
| <b>nevirapine (NVP)</b>  | Intermediate Resistance        |
| <b>rilpivirine (RPV)</b> | Low-Level Resistance           |

### RT Comments

#### NNRTI

- **V179D** is a polymorphic accessory NNRTI-selected mutation. It contributes low-levels reductions in susceptibility to each of the NNRTIs. The combination of **V179D** and K103R act synergistically to reduce NVP and EFV susceptibility. **V179D** has a low weight in the Tibotec ETR genotypic susceptibility score. V179E is a non-polymorphic mutation occasionally selected by NVP and EFV. V179E appears similar to **V179D** in its effects on NNRTIs. **V179D/E** do not appear to reduce the virological response to a first-line EFV-containing regimen.

**Other**

- **K103R** is a polymorphic mutation that alone has no effect on NNRTI susceptibility. However, in combination with V179D, it causes intermediate resistance to EFV and NVP.

## Mutation Scoring: RT

| <b>NRTI</b> | <b>ABC</b> | <b>AZT</b> | <b>D4T</b> | <b>DDI</b> | <b>FTC</b> | <b>3TC</b> | <b>TDF</b> |
|-------------|------------|------------|------------|------------|------------|------------|------------|
| Total       | 0          | 0          | 0          | 0          | 0          | 0          | 0          |

| <b>NNRTI</b>  | <b>EFV</b> | <b>ETR</b> | <b>NVP</b> | <b>RPV</b> |
|---------------|------------|------------|------------|------------|
| V179D         | 10         | 10         | 10         | 10         |
| K103R + V179D | 20         | 0          | 20         | 15         |
| Total         | 30         | 10         | 30         | 25         |

## Sequence CQ13002447

### Sequence Summary

Sequence includes PR: codons 1 - 99  
 Sequence includes RT: codons 1 - 241  
 Subtype: CRF07\_BC (2.84%)  
 PR SDRMs: None  
 RT SDRMs: None

### Sequence Quality Assessment

#### PR

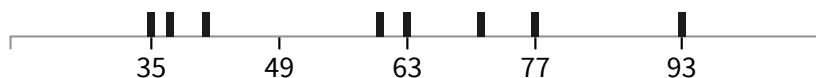

#### RT

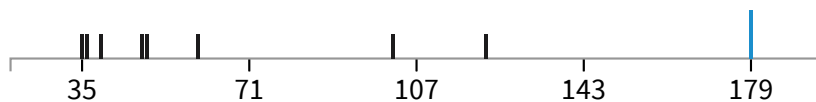

### Drug Resistance Interpretation: PR

PI Major Resistance Mutations: None  
 PI Accessory Resistance Mutations: None  
 Other Mutations: E35D, N37D, R41K, D60E, L63P, A71T, V77I, I93L

#### Protease Inhibitors

|                                |             |
|--------------------------------|-------------|
| <b>atazanavir/r (ATV/r)</b>    | Susceptible |
| <b>darunavir/r (DRV/r)</b>     | Susceptible |
| <b>fosamprenavir/r (FPV/r)</b> | Susceptible |
| <b>indinavir/r (IDV/r)</b>     | Susceptible |
| <b>lopinavir/r (LPV/r)</b>     | Susceptible |
| <b>nelfinavir (NFV)</b>        | Susceptible |
| <b>saquinavir/r (SQV/r)</b>    | Susceptible |
| <b>tipranavir/r (TPV/r)</b>    | Susceptible |



**PR Comments****Other**

- **A71V/T** are polymorphic, PI-selected accessory mutations that increase the replication of viruses with other PI-resistance mutations.

## Mutation Scoring: PR

| PI    | ATV/r | DRV/r | FPV/r | IDV/r | LPV/r | NFV | SQV/r | TPV/r |
|-------|-------|-------|-------|-------|-------|-----|-------|-------|
| Total | 0     | 0     | 0     | 0     | 0     | 0   | 0     | 0     |

## Drug Resistance Interpretation: RT

NRTI Resistance Mutations: None  
 NNRTI Resistance Mutations: **V179D**  
 Other Mutations: V35T, E36A, T39D, S48T, K49R, V60I, K102R, K122E

**Nucleoside Reverse Transcriptase Inhibitors**

|                            |             |
|----------------------------|-------------|
| <b>abacavir (ABC)</b>      | Susceptible |
| <b>zidovudine (AZT)</b>    | Susceptible |
| <b>stavudine (D4T)</b>     | Susceptible |
| <b>didanosine (DDI)</b>    | Susceptible |
| <b>emtricitabine (FTC)</b> | Susceptible |
| <b>lamivudine (3TC)</b>    | Susceptible |
| <b>tenofovir (TDF)</b>     | Susceptible |

**Non-nucleoside Reverse Transcriptase Inhibitors**

|                          |                                |
|--------------------------|--------------------------------|
| <b>efavirenz (EFV)</b>   | Potential Low-Level Resistance |
| <b>etravirine (ETR)</b>  | Potential Low-Level Resistance |
| <b>nevirapine (NVP)</b>  | Potential Low-Level Resistance |
| <b>rilpivirine (RPV)</b> | Potential Low-Level Resistance |

**RT Comments****NNRTI**

- **V179D** is a polymorphic accessory NNRTI-selected mutation. It contributes low-levels

reductions in susceptibility to each of the NNRTIs. The combination of **V179D** and K103R act synergistically to reduce NVP and EFV susceptibility. **V179D** has a low weight in the Tibotec ETR genotypic susceptibility score. V179E is a non-polymorphic mutation occasionally selected by NVP and EFV. V179E appears similar to **V179D** in its effects on NNRTIs. **V179D/E** do not appear to reduce the virological response to a first-line EFV-containing regimen.

#### Mutation Scoring: RT

| <b>NRTI</b> | <b>ABC</b> | <b>AZT</b> | <b>D4T</b> | <b>DDI</b> | <b>FTC</b> | <b>3TC</b> | <b>TDF</b> |
|-------------|------------|------------|------------|------------|------------|------------|------------|
| Total       | 0          | 0          | 0          | 0          | 0          | 0          | 0          |

| <b>NNRTI</b> | <b>EFV</b> | <b>ETR</b> | <b>NVP</b> | <b>RPV</b> |
|--------------|------------|------------|------------|------------|
| V179D        | 10         | 10         | 10         | 10         |
| Total        | 10         | 10         | 10         | 10         |

## Sequence CQ13002852

### Sequence Summary

|                       |                |
|-----------------------|----------------|
| Sequence includes PR: | codons 1 - 99  |
| Sequence includes RT: | codons 1 - 241 |
| Subtype:              | B + C (3.04%)  |
| PR SDRMs:             | None           |
| RT SDRMs:             | None           |

### Sequence Quality Assessment

#### PR

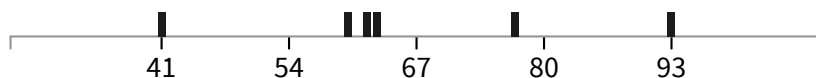

#### RT

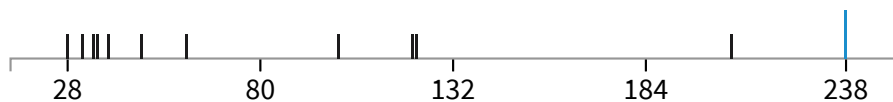

### Drug Resistance Interpretation: PR

|                                    |                                    |
|------------------------------------|------------------------------------|
| PI Major Resistance Mutations:     | None                               |
| PI Accessory Resistance Mutations: | None                               |
| Other Mutations:                   | R41K, D60E, I62V, L63P, V77I, I93L |

#### Protease Inhibitors

|                                |             |
|--------------------------------|-------------|
| <b>atazanavir/r (ATV/r)</b>    | Susceptible |
| <b>darunavir/r (DRV/r)</b>     | Susceptible |
| <b>fosamprenavir/r (FPV/r)</b> | Susceptible |
| <b>indinavir/r (IDV/r)</b>     | Susceptible |
| <b>lopinavir/r (LPV/r)</b>     | Susceptible |
| <b>nelfinavir (NFV)</b>        | Susceptible |
| <b>saquinavir/r (SQV/r)</b>    | Susceptible |
| <b>tipranavir/r (TPV/r)</b>    | Susceptible |

## Mutation Scoring: PR

| PI    | ATV/r | DRV/r | FPV/r | IDV/r | LPV/r | NFV | SQV/r | TPV/r |
|-------|-------|-------|-------|-------|-------|-----|-------|-------|
| Total | 0     | 0     | 0     | 0     | 0     | 0   | 0     | 0     |

## Drug Resistance Interpretation: RT

NRTI Resistance Mutations: None  
 NNRTI Resistance Mutations: **K238N**  
 Other Mutations: E28K, K32E, V35T, E36A, T39D, S48T, V60I, K101R, D121Y, K122E, Q207H

### Nucleoside Reverse Transcriptase Inhibitors

|                            |             |
|----------------------------|-------------|
| <b>abacavir (ABC)</b>      | Susceptible |
| <b>zidovudine (AZT)</b>    | Susceptible |
| <b>stavudine (D4T)</b>     | Susceptible |
| <b>didanosine (DDI)</b>    | Susceptible |
| <b>emtricitabine (FTC)</b> | Susceptible |
| <b>lamivudine (3TC)</b>    | Susceptible |
| <b>tenofovir (TDF)</b>     | Susceptible |

### Non-nucleoside Reverse Transcriptase Inhibitors

|                          |                                |
|--------------------------|--------------------------------|
| <b>efavirenz (EFV)</b>   | Potential Low-Level Resistance |
| <b>etravirine (ETR)</b>  | Susceptible                    |
| <b>nevirapine (NVP)</b>  | Potential Low-Level Resistance |
| <b>rilpivirine (RPV)</b> | Susceptible                    |

### RT Comments

#### NNRTI

- K238T is a non-polymorphic mutation selected in patients receiving NVP and EFV. It usually occurs in combination with K103N. Alone it confers low/intermediate reductions in NVP and EFV susceptibility. **K238N** is a non-polymorphic accessory mutation that is also selected by NVP and EFV. It appears to have minimal, if any, effect on NNRTI susceptibility.

## Mutation Scoring: RT

| <b>NRTI</b> | <b>ABC</b> | <b>AZT</b> | <b>D4T</b> | <b>DDI</b> | <b>FTC</b> | <b>3TC</b> | <b>TDF</b> |
|-------------|------------|------------|------------|------------|------------|------------|------------|
| Total       | 0          | 0          | 0          | 0          | 0          | 0          | 0          |

| <b>NNRTI</b> | <b>EFV</b> | <b>ETR</b> | <b>NVP</b> | <b>RPV</b> |
|--------------|------------|------------|------------|------------|
| K238N        | 10         | 0          | 10         | 0          |
| Total        | 10         | 0          | 10         | 0          |

## Sequence CQ13003037

### Sequence Summary

Sequence includes PR: codons 1 - 99  
 Sequence includes RT: codons 1 - 241  
 Subtype: B + CRF01\_AE (3.14%)  
 PR SDRMs: None  
 RT SDRMs: None

### Sequence Quality Assessment

#### PR

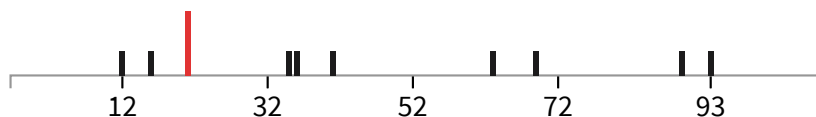

#### RT

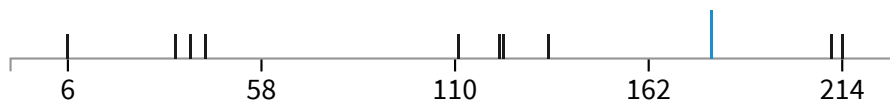

### Drug Resistance Interpretation: PR

PI Major Resistance Mutations: None  
 PI Accessory Resistance Mutations: None  
 Other Mutations: T12P, G16E, E21R, E35D, M36I, R41K, L63N, H69K, L89M, I93L

#### Protease Inhibitors

|                                |             |
|--------------------------------|-------------|
| <b>atazanavir/r (ATV/r)</b>    | Susceptible |
| <b>darunavir/r (DRV/r)</b>     | Susceptible |
| <b>fosamprenavir/r (FPV/r)</b> | Susceptible |
| <b>indinavir/r (IDV/r)</b>     | Susceptible |
| <b>lopinavir/r (LPV/r)</b>     | Susceptible |
| <b>nelfinavir (NFV)</b>        | Susceptible |
| <b>saquinavir/r (SQV/r)</b>    | Susceptible |

**tipranavir/r (TPV/r)**

Susceptible

Mutation Scoring: PR

| PI    | ATV/r | DRV/r | FPV/r | IDV/r | LPV/r | NFV | SQV/r | TPV/r |
|-------|-------|-------|-------|-------|-------|-----|-------|-------|
| Total | 0     | 0     | 0     | 0     | 0     | 0   | 0     | 0     |

Drug Resistance Interpretation: RT

NRTI Resistance Mutations: None  
 NNRTI Resistance Mutations: **V179E**  
 Other Mutations: E6D, V35T, T39K, K43E, V111I, K122E, D123S, I135R, R211K, F214L

**Nucleoside Reverse Transcriptase Inhibitors**

|                            |             |
|----------------------------|-------------|
| <b>abacavir (ABC)</b>      | Susceptible |
| <b>zidovudine (AZT)</b>    | Susceptible |
| <b>stavudine (D4T)</b>     | Susceptible |
| <b>didanosine (DDI)</b>    | Susceptible |
| <b>emtricitabine (FTC)</b> | Susceptible |
| <b>lamivudine (3TC)</b>    | Susceptible |
| <b>tenofovir (TDF)</b>     | Susceptible |

**Non-nucleoside Reverse Transcriptase Inhibitors**

|                          |                                |
|--------------------------|--------------------------------|
| <b>efavirenz (EFV)</b>   | Potential Low-Level Resistance |
| <b>etravirine (ETR)</b>  | Potential Low-Level Resistance |
| <b>nevirapine (NVP)</b>  | Potential Low-Level Resistance |
| <b>rilpivirine (RPV)</b> | Potential Low-Level Resistance |

**RT Comments****NNRTI**

- V179D is a polymorphic accessory NNRTI-selected mutation. It contributes low-levels reductions in susceptibility to each of the NNRTIs. The combination of V179D and K103R act synergistically to reduce NVP and EFV susceptibility. V179D has a low weight in the Tibotec ETR genotypic susceptibility score. **V179E** is a non-polymorphic mutation occasionally selected by NVP and EFV. **V179E** appears similar to V179D in its

effects on NNRTIs. **V179D/E** do not appear to reduce the virological response to a first-line EFV-containing regimen.

#### Mutation Scoring: RT

| <b>NRTI</b> | <b>ABC</b> | <b>AZT</b> | <b>D4T</b> | <b>DDI</b> | <b>FTC</b> | <b>3TC</b> | <b>TDF</b> |
|-------------|------------|------------|------------|------------|------------|------------|------------|
| Total       | 0          | 0          | 0          | 0          | 0          | 0          | 0          |

| <b>NNRTI</b> | <b>EFV</b> | <b>ETR</b> | <b>NVP</b> | <b>RPV</b> |
|--------------|------------|------------|------------|------------|
| V179E        | 10         | 10         | 10         | 10         |
| Total        | 10         | 10         | 10         | 10         |



## Sequence CQ13003228

### Sequence Summary

|                       |                |
|-----------------------|----------------|
| Sequence includes PR: | codons 1 - 99  |
| Sequence includes RT: | codons 1 - 241 |
| Subtype:              | B + C (6.08%)  |
| PR SDRMs:             | None           |
| RT SDRMs:             | None           |

### Sequence Quality Assessment

#### PR

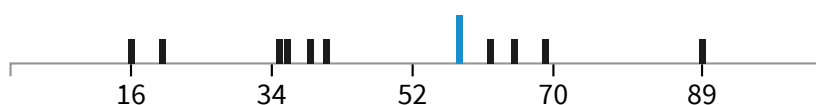

#### RT

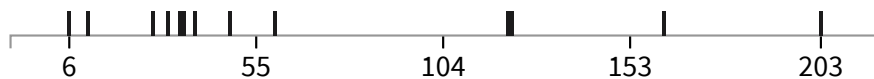

### Drug Resistance Interpretation: PR

|                                    |                                                            |
|------------------------------------|------------------------------------------------------------|
| PI Major Resistance Mutations:     | None                                                       |
| PI Accessory Resistance Mutations: | <b>Q58E</b>                                                |
| Other Mutations:                   | G16E, K20R, E35D, M36I, P39S, R41K, I62V, E65D, H69K, L89M |

#### Protease Inhibitors

|                                |                                |
|--------------------------------|--------------------------------|
| <b>atazanavir/r (ATV/r)</b>    | Susceptible                    |
| <b>darunavir/r (DRV/r)</b>     | Susceptible                    |
| <b>fosamprenavir/r (FPV/r)</b> | Susceptible                    |
| <b>indinavir/r (IDV/r)</b>     | Susceptible                    |
| <b>lopinavir/r (LPV/r)</b>     | Susceptible                    |
| <b>nelfinavir (NFV)</b>        | Potential Low-Level Resistance |
| <b>saquinavir/r (SQV/r)</b>    | Susceptible                    |

**tipranavir/r (TPV/r)**

## Low-Level Resistance

**PR Comments****PI Accessory**

- **Q58E** is a non-polymorphic accessory PI-selected mutation associated with reduced susceptibility to TPV and possibly other PIs.

**Other**

- **K20R** is a highly polymorphic PI-selected accessory mutation.

## Mutation Scoring: PR

| PI    | ATV/r | DRV/r | FPV/r | IDV/r | LPV/r | NFV | SQV/r | TPV/r |
|-------|-------|-------|-------|-------|-------|-----|-------|-------|
| Q58E  | 0     | 0     | 0     | 0     | 0     | 10  | 0     | 15    |
| Total | 0     | 0     | 0     | 0     | 0     | 10  | 0     | 15    |

## Drug Resistance Interpretation: RT

NRTI Resistance Mutations: None  
 NNRTI Resistance Mutations: None  
 Other Mutations: E6D, K11T, E28K, K32E, V35T, E36A, T39D, S48T, V60I, D121Y, K122E, S162C, E203D

**Nucleoside Reverse Transcriptase Inhibitors**

|                            |             |
|----------------------------|-------------|
| <b>abacavir (ABC)</b>      | Susceptible |
| <b>zidovudine (AZT)</b>    | Susceptible |
| <b>stavudine (D4T)</b>     | Susceptible |
| <b>didanosine (DDI)</b>    | Susceptible |
| <b>emtricitabine (FTC)</b> | Susceptible |
| <b>lamivudine (3TC)</b>    | Susceptible |
| <b>tenofovir (TDF)</b>     | Susceptible |

**Non-nucleoside Reverse Transcriptase Inhibitors**

|                         |             |
|-------------------------|-------------|
| <b>efavirenz (EFV)</b>  | Susceptible |
| <b>etravirine (ETR)</b> | Susceptible |

**nevirapine (NVP)**

Susceptible

**rilpivirine (RPV)**

Susceptible

Mutation Scoring: RT

| <b>NRTI</b> | <b>ABC</b> | <b>AZT</b> | <b>D4T</b> | <b>DDI</b> | <b>FTC</b> | <b>3TC</b> | <b>TDF</b> |
|-------------|------------|------------|------------|------------|------------|------------|------------|
| Total       | 0          | 0          | 0          | 0          | 0          | 0          | 0          |

| <b>NNRTI</b> | <b>EFV</b> | <b>ETR</b> | <b>NVP</b> | <b>RPV</b> |
|--------------|------------|------------|------------|------------|
| Total        | 0          | 0          | 0          | 0          |

## Sequence LY12003986

### Sequence Summary

Sequence includes PR: codons 1 - 99  
 Sequence includes RT: codons 1 - 241  
 Subtype: CRF55\_01B (2.45%)  
 PR SDRMs: None  
 RT SDRMs: None

### Sequence Quality Assessment

#### PR

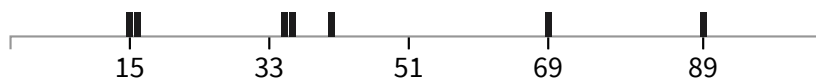

#### RT

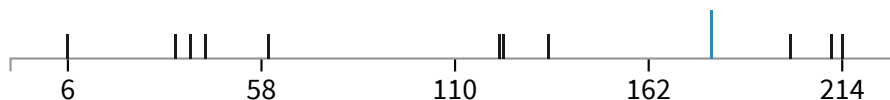

### Drug Resistance Interpretation: PR

PI Major Resistance Mutations: None  
 PI Accessory Resistance Mutations: None  
 Other Mutations: I15V, G16E, E35D, M36I, R41K, H69K, L89M

#### Protease Inhibitors

|                                |             |
|--------------------------------|-------------|
| <b>atazanavir/r (ATV/r)</b>    | Susceptible |
| <b>darunavir/r (DRV/r)</b>     | Susceptible |
| <b>fosamprenavir/r (FPV/r)</b> | Susceptible |
| <b>indinavir/r (IDV/r)</b>     | Susceptible |
| <b>lopinavir/r (LPV/r)</b>     | Susceptible |
| <b>nelfinavir (NFV)</b>        | Susceptible |
| <b>saquinavir/r (SQV/r)</b>    | Susceptible |
| <b>tipranavir/r (TPV/r)</b>    | Susceptible |

## Mutation Scoring: PR

| PI    | ATV/r | DRV/r | FPV/r | IDV/r | LPV/r | NFV | SQV/r | TPV/r |
|-------|-------|-------|-------|-------|-------|-----|-------|-------|
| Total | 0     | 0     | 0     | 0     | 0     | 0   | 0     | 0     |

## Drug Resistance Interpretation: RT

|                             |                                                                       |
|-----------------------------|-----------------------------------------------------------------------|
| NRTI Resistance Mutations:  | None                                                                  |
| NNRTI Resistance Mutations: | <b>V179E</b>                                                          |
| Other Mutations:            | E6D, V35T, T39K, K43E, V60I, K122E, D123S, I135R, T200I, R211K, F214L |

### Nucleoside Reverse Transcriptase Inhibitors

|                            |             |
|----------------------------|-------------|
| <b>abacavir (ABC)</b>      | Susceptible |
| <b>zidovudine (AZT)</b>    | Susceptible |
| <b>stavudine (D4T)</b>     | Susceptible |
| <b>didanosine (DDI)</b>    | Susceptible |
| <b>emtricitabine (FTC)</b> | Susceptible |
| <b>lamivudine (3TC)</b>    | Susceptible |
| <b>tenofovir (TDF)</b>     | Susceptible |

### Non-nucleoside Reverse Transcriptase Inhibitors

|                          |                                |
|--------------------------|--------------------------------|
| <b>efavirenz (EFV)</b>   | Potential Low-Level Resistance |
| <b>etravirine (ETR)</b>  | Potential Low-Level Resistance |
| <b>nevirapine (NVP)</b>  | Potential Low-Level Resistance |
| <b>rilpivirine (RPV)</b> | Potential Low-Level Resistance |

### RT Comments

#### NNRTI

- V179D is a polymorphic accessory NNRTI-selected mutation. It contributes low-levels reductions in susceptibility to each of the NNRTIs. The combination of V179D and K103R act synergistically to reduce NVP and EFV susceptibility. V179D has a low weight in the Tibotec ETR genotypic susceptibility score. **V179E** is a non-polymorphic mutation occasionally selected by NVP and EFV. **V179E** appears similar to V179D in its effects on NNRTIs. **V179D/E** do not appear to reduce the virological response to a first-line EFV-containing regimen.

## Mutation Scoring: RT

| <b>NRTI</b> | <b>ABC</b> | <b>AZT</b> | <b>D4T</b> | <b>DDI</b> | <b>FTC</b> | <b>3TC</b> | <b>TDF</b> |
|-------------|------------|------------|------------|------------|------------|------------|------------|
| Total       | 0          | 0          | 0          | 0          | 0          | 0          | 0          |

| <b>NNRTI</b> | <b>EFV</b> | <b>ETR</b> | <b>NVP</b> | <b>RPV</b> |
|--------------|------------|------------|------------|------------|
| V179E        | 10         | 10         | 10         | 10         |
| Total        | 10         | 10         | 10         | 10         |

## Sequence LY12004233

### Sequence Summary

|                       |                |
|-----------------------|----------------|
| Sequence includes PR: | codons 1 - 99  |
| Sequence includes RT: | codons 1 - 241 |
| Subtype:              | B + C (3.24%)  |
| PR SDRMs:             | None           |
| RT SDRMs:             | G190E          |

### Sequence Quality Assessment

#### PR

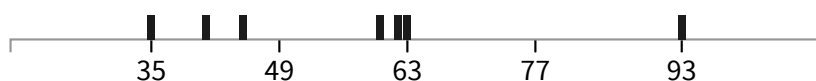

#### RT

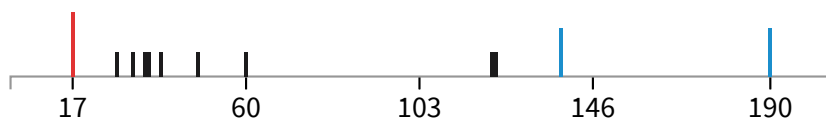

### Drug Resistance Interpretation: PR

|                                    |                                          |
|------------------------------------|------------------------------------------|
| PI Major Resistance Mutations:     | None                                     |
| PI Accessory Resistance Mutations: | None                                     |
| Other Mutations:                   | E35D, R41K, K45R, D60E, I62V, L63P, I93L |

#### Protease Inhibitors

|                                |             |
|--------------------------------|-------------|
| <b>atazanavir/r (ATV/r)</b>    | Susceptible |
| <b>darunavir/r (DRV/r)</b>     | Susceptible |
| <b>fosamprenavir/r (FPV/r)</b> | Susceptible |
| <b>indinavir/r (IDV/r)</b>     | Susceptible |
| <b>lopinavir/r (LPV/r)</b>     | Susceptible |
| <b>nelfinavir (NFV)</b>        | Susceptible |
| <b>saquinavir/r (SQV/r)</b>    | Susceptible |
| <b>tipranavir/r (TPV/r)</b>    | Susceptible |

## Mutation Scoring: PR

| PI    | ATV/r | DRV/r | FPV/r | IDV/r | LPV/r | NFV | SQV/r | TPV/r |
|-------|-------|-------|-------|-------|-------|-----|-------|-------|
| Total | 0     | 0     | 0     | 0     | 0     | 0   | 0     | 0     |

## Drug Resistance Interpretation: RT

|                             |                                                              |
|-----------------------------|--------------------------------------------------------------|
| NRTI Resistance Mutations:  | None                                                         |
| NNRTI Resistance Mutations: | <b>E138G, G190E</b>                                          |
| Other Mutations:            | D17N, E28K, K32E, V35T, E36A, T39N, S48T, V60I, D121Y, K122E |

### Nucleoside Reverse Transcriptase Inhibitors

|                            |             |
|----------------------------|-------------|
| <b>abacavir (ABC)</b>      | Susceptible |
| <b>zidovudine (AZT)</b>    | Susceptible |
| <b>stavudine (D4T)</b>     | Susceptible |
| <b>didanosine (DDI)</b>    | Susceptible |
| <b>emtricitabine (FTC)</b> | Susceptible |
| <b>lamivudine (3TC)</b>    | Susceptible |
| <b>tenofovir (TDF)</b>     | Susceptible |

### Non-nucleoside Reverse Transcriptase Inhibitors

|                          |                         |
|--------------------------|-------------------------|
| <b>efavirenz (EFV)</b>   | High-Level Resistance   |
| <b>etravirine (ETR)</b>  | Intermediate Resistance |
| <b>nevirapine (NVP)</b>  | High-Level Resistance   |
| <b>rilpivirine (RPV)</b> | High-Level Resistance   |

### RT Comments

#### NNRTI

- **E138Q/G** are non-polymorphic accessory mutations frequently selected in patients receiving ETR and RPV and occasionally in patients receiving NVP and EFV. Preliminary data suggest that **E138Q/G** are associated with 2 to 3-fold reduced susceptibility to each of the NNRTIs.
- **G190E** is a non-polymorphic mutation that causes high-level resistance to each of the NNRTIs. G190Q is a less common non-polymorphic NNRTI-selected mutation that is associated with high-level NVP and EFV resistance and probable intermediate / high-level resistance to ETR and RPV.



## Mutation Scoring: RT

| <b>NRTI</b> | <b>ABC</b> | <b>AZT</b> | <b>D4T</b> | <b>DDI</b> | <b>FTC</b> | <b>3TC</b> | <b>TDF</b> |
|-------------|------------|------------|------------|------------|------------|------------|------------|
| Total       | 0          | 0          | 0          | 0          | 0          | 0          | 0          |

| <b>NNRTI</b> | <b>EFV</b> | <b>ETR</b> | <b>NVP</b> | <b>RPV</b> |
|--------------|------------|------------|------------|------------|
| E138G        | 10         | 10         | 10         | 15         |
| G190E        | 60         | 45         | 60         | 60         |
| Total        | 70         | 55         | 70         | 75         |

## Sequence LY14003600

### Sequence Summary

Sequence includes PR: codons 1 - 99  
 Sequence includes RT: codons 1 - 241  
 Subtype: CRF55\_01B (2.75%)  
 PR SDRMs: None  
 RT SDRMs: None

### Sequence Quality Assessment

#### PR

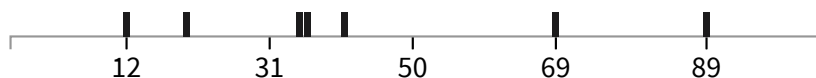

#### RT

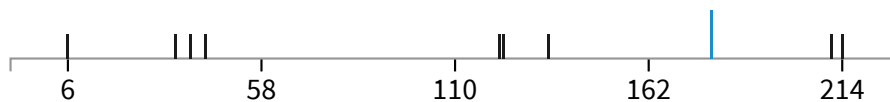

### Drug Resistance Interpretation: PR

PI Major Resistance Mutations: None  
 PI Accessory Resistance Mutations: None  
 Other Mutations: T12S, K20R, E35D, M36I, R41K, H69K, L89M

#### Protease Inhibitors

|                                |             |
|--------------------------------|-------------|
| <b>atazanavir/r (ATV/r)</b>    | Susceptible |
| <b>darunavir/r (DRV/r)</b>     | Susceptible |
| <b>fosamprenavir/r (FPV/r)</b> | Susceptible |
| <b>indinavir/r (IDV/r)</b>     | Susceptible |
| <b>lopinavir/r (LPV/r)</b>     | Susceptible |
| <b>nelfinavir (NFV)</b>        | Susceptible |
| <b>saquinavir/r (SQV/r)</b>    | Susceptible |
| <b>tipranavir/r (TPV/r)</b>    | Susceptible |

**PR Comments****Other**

- **K20R** is a highly polymorphic PI-selected accessory mutation.

## Mutation Scoring: PR

| PI    | ATV/r | DRV/r | FPV/r | IDV/r | LPV/r | NFV | SQV/r | TPV/r |
|-------|-------|-------|-------|-------|-------|-----|-------|-------|
| Total | 0     | 0     | 0     | 0     | 0     | 0   | 0     | 0     |

## Drug Resistance Interpretation: RT

NRTI Resistance Mutations: None  
 NNRTI Resistance Mutations: **V179E**  
 Other Mutations: E6D, V35T, T39K, K43E, K122E, D123S, I135R, R211K, F214L

**Nucleoside Reverse Transcriptase Inhibitors**

|                            |             |
|----------------------------|-------------|
| <b>abacavir (ABC)</b>      | Susceptible |
| <b>zidovudine (AZT)</b>    | Susceptible |
| <b>stavudine (D4T)</b>     | Susceptible |
| <b>didanosine (DDI)</b>    | Susceptible |
| <b>emtricitabine (FTC)</b> | Susceptible |
| <b>lamivudine (3TC)</b>    | Susceptible |
| <b>tenofovir (TDF)</b>     | Susceptible |

**Non-nucleoside Reverse Transcriptase Inhibitors**

|                          |                                |
|--------------------------|--------------------------------|
| <b>efavirenz (EFV)</b>   | Potential Low-Level Resistance |
| <b>etravirine (ETR)</b>  | Potential Low-Level Resistance |
| <b>nevirapine (NVP)</b>  | Potential Low-Level Resistance |
| <b>rilpivirine (RPV)</b> | Potential Low-Level Resistance |

**RT Comments****NNRTI**

- **V179D** is a polymorphic accessory NNRTI-selected mutation. It contributes low-levels

reductions in susceptibility to each of the NNRTIs. The combination of V179D and K103R act synergistically to reduce NVP and EFV susceptibility. V179D has a low weight in the Tibotec ETR genotypic susceptibility score. **V179E** is a non-polymorphic mutation occasionally selected by NVP and EFV. **V179E** appears similar to V179D in its effects on NNRTIs. **V179D/E** do not appear to reduce the virological response to a first-line EFV-containing regimen.

#### Mutation Scoring: RT

| <b>NRTI</b> | <b>ABC</b> | <b>AZT</b> | <b>D4T</b> | <b>DDI</b> | <b>FTC</b> | <b>3TC</b> | <b>TDF</b> |
|-------------|------------|------------|------------|------------|------------|------------|------------|
| Total       | 0          | 0          | 0          | 0          | 0          | 0          | 0          |

| <b>NNRTI</b> | <b>EFV</b> | <b>ETR</b> | <b>NVP</b> | <b>RPV</b> |
|--------------|------------|------------|------------|------------|
| V179E        | 10         | 10         | 10         | 10         |
| Total        | 10         | 10         | 10         | 10         |

## Sequence MY1400058

### Sequence Summary

Sequence includes PR: codons 1 - 99  
 Sequence includes RT: codons 1 - 241  
 Subtype: CRF07\_BC (2.84%)  
 PR SDRMs: None  
 RT SDRMs: None

### Sequence Quality Assessment

#### PR

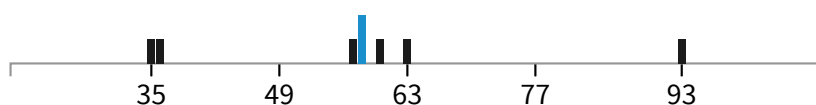

#### RT

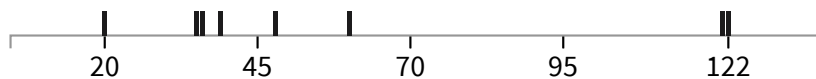

### Drug Resistance Interpretation: PR

PI Major Resistance Mutations: None  
 PI Accessory Resistance Mutations: **Q58E**  
 Other Mutations: E35D, M36I, R57K, D60E, L63P, I93L

#### Protease Inhibitors

|                                |                                |
|--------------------------------|--------------------------------|
| <b>atazanavir/r (ATV/r)</b>    | Susceptible                    |
| <b>darunavir/r (DRV/r)</b>     | Susceptible                    |
| <b>fosamprenavir/r (FPV/r)</b> | Susceptible                    |
| <b>indinavir/r (IDV/r)</b>     | Susceptible                    |
| <b>lopinavir/r (LPV/r)</b>     | Susceptible                    |
| <b>nelfinavir (NFV)</b>        | Potential Low-Level Resistance |
| <b>saquinavir/r (SQV/r)</b>    | Susceptible                    |
| <b>tipranavir/r (TPV/r)</b>    | Low-Level Resistance           |

**PR Comments****PI Accessory**

- **Q58E** is a non-polymorphic accessory PI-selected mutation associated with reduced susceptibility to TPV and possibly other PIs.

## Mutation Scoring: PR

| PI    | ATV/r | DRV/r | FPV/r | IDV/r | LPV/r | NFV | SQV/r | TPV/r |
|-------|-------|-------|-------|-------|-------|-----|-------|-------|
| Q58E  | 0     | 0     | 0     | 0     | 0     | 10  | 0     | 15    |
| Total | 0     | 0     | 0     | 0     | 0     | 10  | 0     | 15    |

## Drug Resistance Interpretation: RT

NRTI Resistance Mutations: None  
 NNRTI Resistance Mutations: None  
 Other Mutations: K20R, V35M, E36A, T39D, S48T, V60I, D121Y, K122E

**Nucleoside Reverse Transcriptase Inhibitors**

|                            |             |
|----------------------------|-------------|
| <b>abacavir (ABC)</b>      | Susceptible |
| <b>zidovudine (AZT)</b>    | Susceptible |
| <b>stavudine (D4T)</b>     | Susceptible |
| <b>didanosine (DDI)</b>    | Susceptible |
| <b>emtricitabine (FTC)</b> | Susceptible |
| <b>lamivudine (3TC)</b>    | Susceptible |
| <b>tenofovir (TDF)</b>     | Susceptible |

**Non-nucleoside Reverse Transcriptase Inhibitors**

|                          |             |
|--------------------------|-------------|
| <b>efavirenz (EFV)</b>   | Susceptible |
| <b>etravirine (ETR)</b>  | Susceptible |
| <b>nevirapine (NVP)</b>  | Susceptible |
| <b>rilpivirine (RPV)</b> | Susceptible |

## Mutation Scoring: RT

| <b>NRTI</b> | <b>ABC</b> | <b>AZT</b> | <b>D4T</b> | <b>DDI</b> | <b>FTC</b> | <b>3TC</b> | <b>TDF</b> |
|-------------|------------|------------|------------|------------|------------|------------|------------|
| Total       | 0          | 0          | 0          | 0          | 0          | 0          | 0          |

| <b>NNRTI</b> | <b>EFV</b> | <b>ETR</b> | <b>NVP</b> | <b>RPV</b> |
|--------------|------------|------------|------------|------------|
| Total        | 0          | 0          | 0          | 0          |

## Sequence WS1200312

### Sequence Summary

|                       |                   |
|-----------------------|-------------------|
| Sequence includes PR: | codons 1 - 99     |
| Sequence includes RT: | codons 1 - 241    |
| Subtype:              | CRF55_01B (2.75%) |
| PR SDRMs:             | None              |
| RT SDRMs:             | None              |

### Sequence Quality Assessment

#### PR

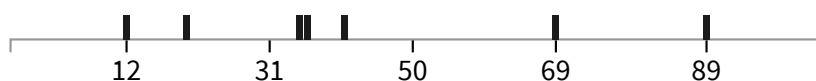

#### RT

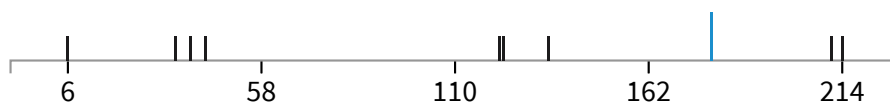

### Drug Resistance Interpretation: PR

|                                    |                                          |
|------------------------------------|------------------------------------------|
| PI Major Resistance Mutations:     | None                                     |
| PI Accessory Resistance Mutations: | None                                     |
| Other Mutations:                   | T12S, K20R, E35D, M36I, R41K, H69K, L89M |

#### Protease Inhibitors

|                                |             |
|--------------------------------|-------------|
| <b>atazanavir/r (ATV/r)</b>    | Susceptible |
| <b>darunavir/r (DRV/r)</b>     | Susceptible |
| <b>fosamprenavir/r (FPV/r)</b> | Susceptible |
| <b>indinavir/r (IDV/r)</b>     | Susceptible |
| <b>lopinavir/r (LPV/r)</b>     | Susceptible |
| <b>nelfinavir (NFV)</b>        | Susceptible |
| <b>saquinavir/r (SQV/r)</b>    | Susceptible |
| <b>tipranavir/r (TPV/r)</b>    | Susceptible |



**PR Comments****Other**

- **K20R** is a highly polymorphic PI-selected accessory mutation.

## Mutation Scoring: PR

| PI    | ATV/r | DRV/r | FPV/r | IDV/r | LPV/r | NFV | SQV/r | TPV/r |
|-------|-------|-------|-------|-------|-------|-----|-------|-------|
| Total | 0     | 0     | 0     | 0     | 0     | 0   | 0     | 0     |

## Drug Resistance Interpretation: RT

NRTI Resistance Mutations: None  
 NNRTI Resistance Mutations: **V179E**  
 Other Mutations: E6D, V35T, T39K, K43E, K122E, D123S, I135R, R211K, F214L

**Nucleoside Reverse Transcriptase Inhibitors**

|                            |             |
|----------------------------|-------------|
| <b>abacavir (ABC)</b>      | Susceptible |
| <b>zidovudine (AZT)</b>    | Susceptible |
| <b>stavudine (D4T)</b>     | Susceptible |
| <b>didanosine (DDI)</b>    | Susceptible |
| <b>emtricitabine (FTC)</b> | Susceptible |
| <b>lamivudine (3TC)</b>    | Susceptible |
| <b>tenofovir (TDF)</b>     | Susceptible |

**Non-nucleoside Reverse Transcriptase Inhibitors**

|                          |                                |
|--------------------------|--------------------------------|
| <b>efavirenz (EFV)</b>   | Potential Low-Level Resistance |
| <b>etravirine (ETR)</b>  | Potential Low-Level Resistance |
| <b>nevirapine (NVP)</b>  | Potential Low-Level Resistance |
| <b>rilpivirine (RPV)</b> | Potential Low-Level Resistance |

**RT Comments****NNRTI**

- V179D is a polymorphic accessory NNRTI-selected mutation. It contributes low-levels

reductions in susceptibility to each of the NNRTIs. The combination of V179D and K103R act synergistically to reduce NVP and EFV susceptibility. V179D has a low weight in the Tibotec ETR genotypic susceptibility score. **V179E** is a non-polymorphic mutation occasionally selected by NVP and EFV. **V179E** appears similar to V179D in its effects on NNRTIs. **V179D/E** do not appear to reduce the virological response to a first-line EFV-containing regimen.

#### Mutation Scoring: RT

| <b>NRTI</b> | <b>ABC</b> | <b>AZT</b> | <b>D4T</b> | <b>DDI</b> | <b>FTC</b> | <b>3TC</b> | <b>TDF</b> |
|-------------|------------|------------|------------|------------|------------|------------|------------|
| Total       | 0          | 0          | 0          | 0          | 0          | 0          | 0          |

| <b>NNRTI</b> | <b>EFV</b> | <b>ETR</b> | <b>NVP</b> | <b>RPV</b> |
|--------------|------------|------------|------------|------------|
| V179E        | 10         | 10         | 10         | 10         |
| Total        | 10         | 10         | 10         | 10         |

## Sequence WS12000334

### Sequence Summary

Sequence includes PR: codons 1 - 99  
 Sequence includes RT: codons 1 - 241  
 Subtype: B (7.16%)  
 PR SDRMs: M46I  
 RT SDRMs: None

### Sequence Quality Assessment

#### PR

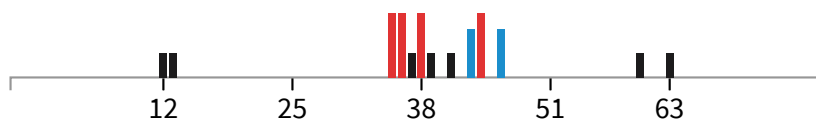

#### RT

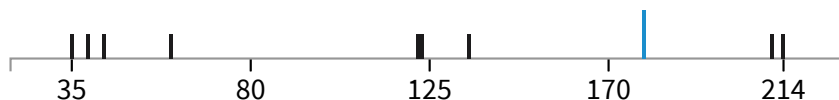

- **Note:** There are 4 unusual mutations in PR: E35V,M36Q,L38Q,P44Y.

### Drug Resistance Interpretation: PR

PI Major Resistance Mutations: **M46I**  
 PI Accessory Resistance Mutations: **K43T**  
 Other Mutations: T12P, I13V, E35V, M36Q, N37K, L38Q, P39A, R41P, P44Y, D60E, L63P

#### Protease Inhibitors

|                                |                                |
|--------------------------------|--------------------------------|
| <b>atazanavir/r (ATV/r)</b>    | Potential Low-Level Resistance |
| <b>darunavir/r (DRV/r)</b>     | Susceptible                    |
| <b>fosamprenavir/r (FPV/r)</b> | Potential Low-Level Resistance |
| <b>indinavir/r (IDV/r)</b>     | Potential Low-Level Resistance |

|                             |                                |
|-----------------------------|--------------------------------|
| <b>lopinavir/r (LPV/r)</b>  | Potential Low-Level Resistance |
| <b>nelfinavir (NFV)</b>     | Intermediate Resistance        |
| <b>saquinavir/r (SQV/r)</b> | Potential Low-Level Resistance |
| <b>tipranavir/r (TPV/r)</b> | Low-Level Resistance           |

**PR Comments****PI Major**

- **M46I/L** are relatively non-polymorphic PI-selected mutations. In combination with other PI-resistance mutations, they are associated with reduced susceptibility to each of the PIs except DRV.

**PI Accessory**

- **K43T** is a non-polymorphic PI-selected accessory mutation. **K43T** is included in the Boehringer-Ingelheim TPV genotypic susceptibility score.

## Mutation Scoring: PR

| PI    | ATV/r | DRV/r | FPV/r | IDV/r | LPV/r | NFV | SQV/r | TPV/r |
|-------|-------|-------|-------|-------|-------|-----|-------|-------|
| M46I  | 10    | 0     | 10    | 10    | 10    | 30  | 10    | 5     |
| K43T  | 0     | 0     | 0     | 0     | 0     | 10  | 0     | 10    |
| Total | 10    | 0     | 10    | 10    | 10    | 40  | 10    | 15    |

## Drug Resistance Interpretation: RT

|                             |                                                           |
|-----------------------------|-----------------------------------------------------------|
| NRTI Resistance Mutations:  | None                                                      |
| NNRTI Resistance Mutations: | <b>V179E</b>                                              |
| Other Mutations:            | V35T, T39K, K43E, V60I, K122E, D123S, I135R, R211K, F214L |

**Nucleoside Reverse Transcriptase Inhibitors**

|                            |             |
|----------------------------|-------------|
| <b>abacavir (ABC)</b>      | Susceptible |
| <b>zidovudine (AZT)</b>    | Susceptible |
| <b>stavudine (D4T)</b>     | Susceptible |
| <b>didanosine (DDI)</b>    | Susceptible |
| <b>emtricitabine (FTC)</b> | Susceptible |

|                         |             |
|-------------------------|-------------|
| <b>lamivudine (3TC)</b> | Susceptible |
| <b>tenofovir (TDF)</b>  | Susceptible |

### Non-nucleoside Reverse Transcriptase Inhibitors

|                          |                                |
|--------------------------|--------------------------------|
| <b>efavirenz (EFV)</b>   | Potential Low-Level Resistance |
| <b>etravirine (ETR)</b>  | Potential Low-Level Resistance |
| <b>nevirapine (NVP)</b>  | Potential Low-Level Resistance |
| <b>rilpivirine (RPV)</b> | Potential Low-Level Resistance |

#### RT Comments

##### NNRTI

- V179D is a polymorphic accessory NNRTI-selected mutation. It contributes low-levels reductions in susceptibility to each of the NNRTIs. The combination of V179D and K103R act synergistically to reduce NVP and EFV susceptibility. V179D has a low weight in the Tibotec ETR genotypic susceptibility score. **V179E** is a non-polymorphic mutation occasionally selected by NVP and EFV. **V179E** appears similar to V179D in its effects on NNRTIs. **V179D/E** do not appear to reduce the virological response to a first-line EFV-containing regimen.

#### Mutation Scoring: RT

| <b>NRTI</b> | <b>ABC</b> | <b>AZT</b> | <b>D4T</b> | <b>DDI</b> | <b>FTC</b> | <b>3TC</b> | <b>TDF</b> |
|-------------|------------|------------|------------|------------|------------|------------|------------|
| Total       | 0          | 0          | 0          | 0          | 0          | 0          | 0          |

| <b>NNRTI</b> | <b>EFV</b> | <b>ETR</b> | <b>NVP</b> | <b>RPV</b> |
|--------------|------------|------------|------------|------------|
| V179E        | 10         | 10         | 10         | 10         |
| Total        | 10         | 10         | 10         | 10         |

## Sequence WS1200352

### Sequence Summary

Sequence includes PR: codons 1 - 99  
 Sequence includes RT: codons 1 - 241  
 Subtype: CRF07\_BC (2.75%)  
 PR SDRMs: None  
 RT SDRMs: None

### Sequence Quality Assessment

#### PR

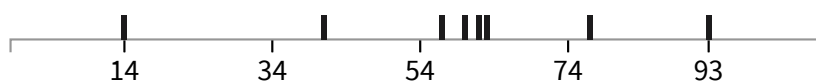

#### RT

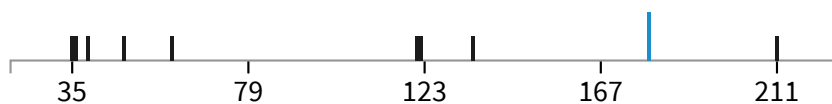

### Drug Resistance Interpretation: PR

PI Major Resistance Mutations: None  
 PI Accessory Resistance Mutations: None  
 Other Mutations: K14R, R41K, R57K, D60E, I62V, L63P, V77I, I93L

#### Protease Inhibitors

|                                |             |
|--------------------------------|-------------|
| <b>atazanavir/r (ATV/r)</b>    | Susceptible |
| <b>darunavir/r (DRV/r)</b>     | Susceptible |
| <b>fosamprenavir/r (FPV/r)</b> | Susceptible |
| <b>indinavir/r (IDV/r)</b>     | Susceptible |
| <b>lopinavir/r (LPV/r)</b>     | Susceptible |
| <b>nelfinavir (NFV)</b>        | Susceptible |
| <b>saquinavir/r (SQV/r)</b>    | Susceptible |
| <b>tipranavir/r (TPV/r)</b>    | Susceptible |

## Mutation Scoring: PR

| PI    | ATV/r | DRV/r | FPV/r | IDV/r | LPV/r | NFV | SQV/r | TPV/r |
|-------|-------|-------|-------|-------|-------|-----|-------|-------|
| Total | 0     | 0     | 0     | 0     | 0     | 0   | 0     | 0     |

## Drug Resistance Interpretation: RT

|                             |                                                          |
|-----------------------------|----------------------------------------------------------|
| NRTI Resistance Mutations:  | None                                                     |
| NNRTI Resistance Mutations: | <b>V179D</b>                                             |
| Other Mutations:            | V35T, E36A, T39D, S48T, V60I, D121H, K122E, I135T, R211K |

### Nucleoside Reverse Transcriptase Inhibitors

|                            |             |
|----------------------------|-------------|
| <b>abacavir (ABC)</b>      | Susceptible |
| <b>zidovudine (AZT)</b>    | Susceptible |
| <b>stavudine (D4T)</b>     | Susceptible |
| <b>didanosine (DDI)</b>    | Susceptible |
| <b>emtricitabine (FTC)</b> | Susceptible |
| <b>lamivudine (3TC)</b>    | Susceptible |
| <b>tenofovir (TDF)</b>     | Susceptible |

### Non-nucleoside Reverse Transcriptase Inhibitors

|                          |                                |
|--------------------------|--------------------------------|
| <b>efavirenz (EFV)</b>   | Potential Low-Level Resistance |
| <b>etravirine (ETR)</b>  | Potential Low-Level Resistance |
| <b>nevirapine (NVP)</b>  | Potential Low-Level Resistance |
| <b>rilpivirine (RPV)</b> | Potential Low-Level Resistance |

### RT Comments

#### NNRTI

- **V179D** is a polymorphic accessory NNRTI-selected mutation. It contributes low-levels reductions in susceptibility to each of the NNRTIs. The combination of **V179D** and K103R act synergistically to reduce NVP and EFV susceptibility. **V179D** has a low weight in the Tibotec ETR genotypic susceptibility score. V179E is a non-polymorphic mutation occasionally selected by NVP and EFV. V179E appears similar to **V179D** in its effects on NNRTIs. **V179D/E** do not appear to reduce the virological response to a first-line EFV-containing regimen.

## Mutation Scoring: RT

| <b>NRTI</b> | <b>ABC</b> | <b>AZT</b> | <b>D4T</b> | <b>DDI</b> | <b>FTC</b> | <b>3TC</b> | <b>TDF</b> |
|-------------|------------|------------|------------|------------|------------|------------|------------|
| Total       | 0          | 0          | 0          | 0          | 0          | 0          | 0          |

| <b>NNRTI</b> | <b>EFV</b> | <b>ETR</b> | <b>NVP</b> | <b>RPV</b> |
|--------------|------------|------------|------------|------------|
| V179D        | 10         | 10         | 10         | 10         |
| Total        | 10         | 10         | 10         | 10         |



## Sequence ws12001012

### Sequence Summary

|                       |                  |
|-----------------------|------------------|
| Sequence includes PR: | codons 1 - 99    |
| Sequence includes RT: | codons 1 - 241   |
| Subtype:              | CRF01_AE (4.12%) |
| PR SDRMs:             | None             |
| RT SDRMs:             | None             |

### Sequence Quality Assessment

#### PR

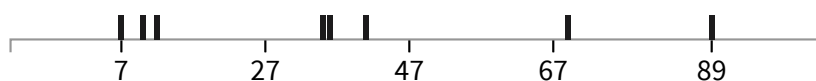

#### RT

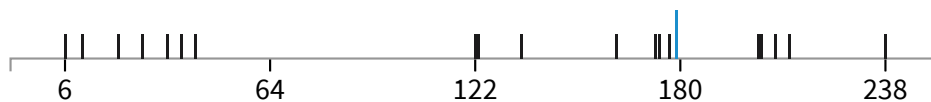

### Drug Resistance Interpretation: PR

|                                    |                                               |
|------------------------------------|-----------------------------------------------|
| PI Major Resistance Mutations:     | None                                          |
| PI Accessory Resistance Mutations: | None                                          |
| Other Mutations:                   | Q7R, L10I, T12A, E35D, M36I, R41K, H69K, L89M |

#### Protease Inhibitors

|                                |             |
|--------------------------------|-------------|
| <b>atazanavir/r (ATV/r)</b>    | Susceptible |
| <b>darunavir/r (DRV/r)</b>     | Susceptible |
| <b>fosamprenavir/r (FPV/r)</b> | Susceptible |
| <b>indinavir/r (IDV/r)</b>     | Susceptible |
| <b>lopinavir/r (LPV/r)</b>     | Susceptible |
| <b>nelfinavir (NFV)</b>        | Susceptible |
| <b>saquinavir/r (SQV/r)</b>    | Susceptible |
| <b>tipranavir/r (TPV/r)</b>    | Susceptible |

**PR Comments****Other**

- **L10I/V** are polymorphic, PI-selected accessory mutations that increase the replication of viruses with other PI-resistance mutations.

## Mutation Scoring: PR

| PI    | ATV/r | DRV/r | FPV/r | IDV/r | LPV/r | NFV | SQV/r | TPV/r |
|-------|-------|-------|-------|-------|-------|-----|-------|-------|
| Total | 0     | 0     | 0     | 0     | 0     | 0   | 0     | 0     |

## Drug Resistance Interpretation: RT

NRTI Resistance Mutations: None

NNRTI Resistance Mutations: **V179D**

Other Mutations: E6D, K11T, V21I, E28A, V35T, T39R, K43E, K122E, D123S, I135V, S162C, K173S, Q174K, D177G, I202V, E203D, Q207A, R211S, K238R

**Nucleoside Reverse Transcriptase Inhibitors**

|                            |             |
|----------------------------|-------------|
| <b>abacavir (ABC)</b>      | Susceptible |
| <b>zidovudine (AZT)</b>    | Susceptible |
| <b>stavudine (D4T)</b>     | Susceptible |
| <b>didanosine (DDI)</b>    | Susceptible |
| <b>emtricitabine (FTC)</b> | Susceptible |
| <b>lamivudine (3TC)</b>    | Susceptible |
| <b>tenofovir (TDF)</b>     | Susceptible |

**Non-nucleoside Reverse Transcriptase Inhibitors**

|                          |                                |
|--------------------------|--------------------------------|
| <b>efavirenz (EFV)</b>   | Potential Low-Level Resistance |
| <b>etravirine (ETR)</b>  | Potential Low-Level Resistance |
| <b>nevirapine (NVP)</b>  | Potential Low-Level Resistance |
| <b>rilpivirine (RPV)</b> | Potential Low-Level Resistance |

**RT Comments**

**NNRTI**

- **V179D** is a polymorphic accessory NNRTI-selected mutation. It contributes low-levels reductions in susceptibility to each of the NNRTIs. The combination of **V179D** and K103R act synergistically to reduce NVP and EFV susceptibility. **V179D** has a low weight in the Tibotec ETR genotypic susceptibility score. V179E is a non-polymorphic mutation occasionally selected by NVP and EFV. V179E appears similar to **V179D** in its effects on NNRTIs. **V179D/E** do not appear to reduce the virological response to a first-line EFV-containing regimen.

**Other**

- **K238R** is a common polymorphism that does not reduce NNRTI susceptibility.

## Mutation Scoring: RT

| <b>NRTI</b> | <b>ABC</b> | <b>AZT</b> | <b>D4T</b> | <b>DDI</b> | <b>FTC</b> | <b>3TC</b> | <b>TDF</b> |
|-------------|------------|------------|------------|------------|------------|------------|------------|
| Total       | 0          | 0          | 0          | 0          | 0          | 0          | 0          |

| <b>NNRTI</b> | <b>EFV</b> | <b>ETR</b> | <b>NVP</b> | <b>RPV</b> |
|--------------|------------|------------|------------|------------|
| V179D        | 10         | 10         | 10         | 10         |
| Total        | 10         | 10         | 10         | 10         |

## Sequence WS12001503

### Sequence Summary

Sequence includes PR: codons 1 - 99  
 Sequence includes RT: codons 1 - 241  
 Subtype: CRF55\_01B (2.25%)  
 PR SDRMs: None  
 RT SDRMs: None

### Sequence Quality Assessment

#### PR

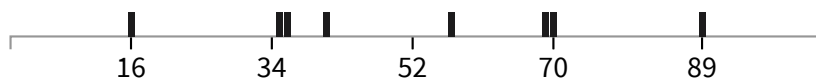

#### RT

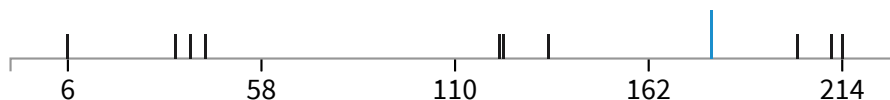

### Drug Resistance Interpretation: PR

PI Major Resistance Mutations: None  
 PI Accessory Resistance Mutations: None  
 Other Mutations: G16E, E35D, M36I, R41K, R57K, H69K, K70R, L89M

#### Protease Inhibitors

|                                |             |
|--------------------------------|-------------|
| <b>atazanavir/r (ATV/r)</b>    | Susceptible |
| <b>darunavir/r (DRV/r)</b>     | Susceptible |
| <b>fosamprenavir/r (FPV/r)</b> | Susceptible |
| <b>indinavir/r (IDV/r)</b>     | Susceptible |
| <b>lopinavir/r (LPV/r)</b>     | Susceptible |
| <b>nelfinavir (NFV)</b>        | Susceptible |
| <b>saquinavir/r (SQV/r)</b>    | Susceptible |
| <b>tipranavir/r (TPV/r)</b>    | Susceptible |

## Mutation Scoring: PR

| PI    | ATV/r | DRV/r | FPV/r | IDV/r | LPV/r | NFV | SQV/r | TPV/r |
|-------|-------|-------|-------|-------|-------|-----|-------|-------|
| Total | 0     | 0     | 0     | 0     | 0     | 0   | 0     | 0     |

## Drug Resistance Interpretation: RT

|                             |                                                                 |
|-----------------------------|-----------------------------------------------------------------|
| NRTI Resistance Mutations:  | None                                                            |
| NNRTI Resistance Mutations: | <b>V179E</b>                                                    |
| Other Mutations:            | E6D, V35T, T39K, K43E, K122E, D123S, I135R, I202V, R211K, F214L |

### Nucleoside Reverse Transcriptase Inhibitors

|                            |             |
|----------------------------|-------------|
| <b>abacavir (ABC)</b>      | Susceptible |
| <b>zidovudine (AZT)</b>    | Susceptible |
| <b>stavudine (D4T)</b>     | Susceptible |
| <b>didanosine (DDI)</b>    | Susceptible |
| <b>emtricitabine (FTC)</b> | Susceptible |
| <b>lamivudine (3TC)</b>    | Susceptible |
| <b>tenofovir (TDF)</b>     | Susceptible |

### Non-nucleoside Reverse Transcriptase Inhibitors

|                          |                                |
|--------------------------|--------------------------------|
| <b>efavirenz (EFV)</b>   | Potential Low-Level Resistance |
| <b>etravirine (ETR)</b>  | Potential Low-Level Resistance |
| <b>nevirapine (NVP)</b>  | Potential Low-Level Resistance |
| <b>rilpivirine (RPV)</b> | Potential Low-Level Resistance |

### RT Comments

#### NNRTI

- V179D is a polymorphic accessory NNRTI-selected mutation. It contributes low-levels reductions in susceptibility to each of the NNRTIs. The combination of V179D and K103R act synergistically to reduce NVP and EFV susceptibility. V179D has a low weight in the Tibotec ETR genotypic susceptibility score. **V179E** is a non-polymorphic mutation occasionally selected by NVP and EFV. **V179E** appears similar to V179D in its effects on NNRTIs. **V179D/E** do not appear to reduce the virological response to a first-line EFV-containing regimen.

## Mutation Scoring: RT

| <b>NRTI</b> | <b>ABC</b> | <b>AZT</b> | <b>D4T</b> | <b>DDI</b> | <b>FTC</b> | <b>3TC</b> | <b>TDF</b> |
|-------------|------------|------------|------------|------------|------------|------------|------------|
| Total       | 0          | 0          | 0          | 0          | 0          | 0          | 0          |

| <b>NNRTI</b> | <b>EFV</b> | <b>ETR</b> | <b>NVP</b> | <b>RPV</b> |
|--------------|------------|------------|------------|------------|
| V179E        | 10         | 10         | 10         | 10         |
| Total        | 10         | 10         | 10         | 10         |

## Sequence WS13003163

### Sequence Summary

|                       |                |
|-----------------------|----------------|
| Sequence includes PR: | codons 1 - 99  |
| Sequence includes RT: | codons 1 - 241 |
| Subtype:              | B + C (3.53%)  |
| PR SDRMs:             | None           |
| RT SDRMs:             | None           |

### Sequence Quality Assessment

#### PR

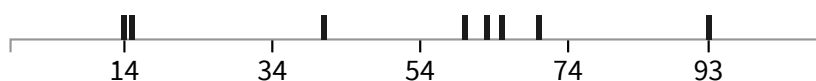

#### RT

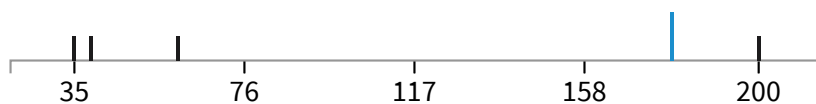

### Drug Resistance Interpretation: PR

|                                    |                                                |
|------------------------------------|------------------------------------------------|
| PI Major Resistance Mutations:     | None                                           |
| PI Accessory Resistance Mutations: | None                                           |
| Other Mutations:                   | K14R, I15V, R41K, D60E, L63P, E65D, K70T, I93L |

#### Protease Inhibitors

|                                |             |
|--------------------------------|-------------|
| <b>atazanavir/r (ATV/r)</b>    | Susceptible |
| <b>darunavir/r (DRV/r)</b>     | Susceptible |
| <b>fosamprenavir/r (FPV/r)</b> | Susceptible |
| <b>indinavir/r (IDV/r)</b>     | Susceptible |
| <b>lopinavir/r (LPV/r)</b>     | Susceptible |
| <b>nelfinavir (NFV)</b>        | Susceptible |
| <b>saquinavir/r (SQV/r)</b>    | Susceptible |
| <b>tipranavir/r (TPV/r)</b>    | Susceptible |

## Mutation Scoring: PR

| PI    | ATV/r | DRV/r | FPV/r | IDV/r | LPV/r | NFV | SQV/r | TPV/r |
|-------|-------|-------|-------|-------|-------|-----|-------|-------|
| Total | 0     | 0     | 0     | 0     | 0     | 0   | 0     | 0     |

## Drug Resistance Interpretation: RT

NRTI Resistance Mutations: None  
 NNRTI Resistance Mutations: **V179D**  
 Other Mutations: V35K, T39D, V60I, T200A

### Nucleoside Reverse Transcriptase Inhibitors

|                            |             |
|----------------------------|-------------|
| <b>abacavir (ABC)</b>      | Susceptible |
| <b>zidovudine (AZT)</b>    | Susceptible |
| <b>stavudine (D4T)</b>     | Susceptible |
| <b>didanosine (DDI)</b>    | Susceptible |
| <b>emtricitabine (FTC)</b> | Susceptible |
| <b>lamivudine (3TC)</b>    | Susceptible |
| <b>tenofovir (TDF)</b>     | Susceptible |

### Non-nucleoside Reverse Transcriptase Inhibitors

|                          |                                |
|--------------------------|--------------------------------|
| <b>efavirenz (EFV)</b>   | Potential Low-Level Resistance |
| <b>etravirine (ETR)</b>  | Potential Low-Level Resistance |
| <b>nevirapine (NVP)</b>  | Potential Low-Level Resistance |
| <b>rilpivirine (RPV)</b> | Potential Low-Level Resistance |

### RT Comments

#### NNRTI

- **V179D** is a polymorphic accessory NNRTI-selected mutation. It contributes low-levels reductions in susceptibility to each of the NNRTIs. The combination of **V179D** and K103R act synergistically to reduce NVP and EFV susceptibility. **V179D** has a low weight in the Tibotec ETR genotypic susceptibility score. V179E is a non-polymorphic mutation occasionally selected by NVP and EFV. V179E appears similar to **V179D** in its effects on NNRTIs. **V179D/E** do not appear to reduce the virological response to a first-line EFV-containing regimen.
